# Supplementary material
Source: Royal Society of Chemistry journal article supplement (doi:10.1039/d5fo04965b)

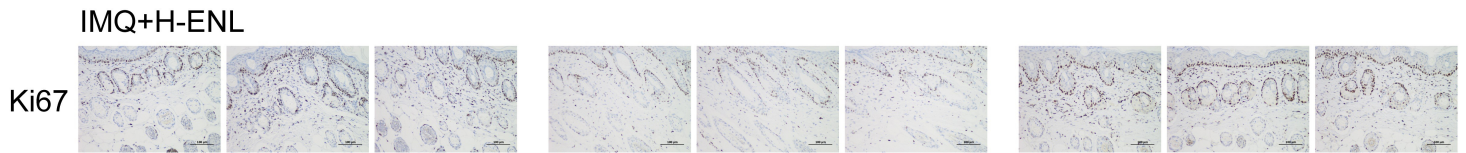

Figure5F. n=3 The arrow indicates the target protein.

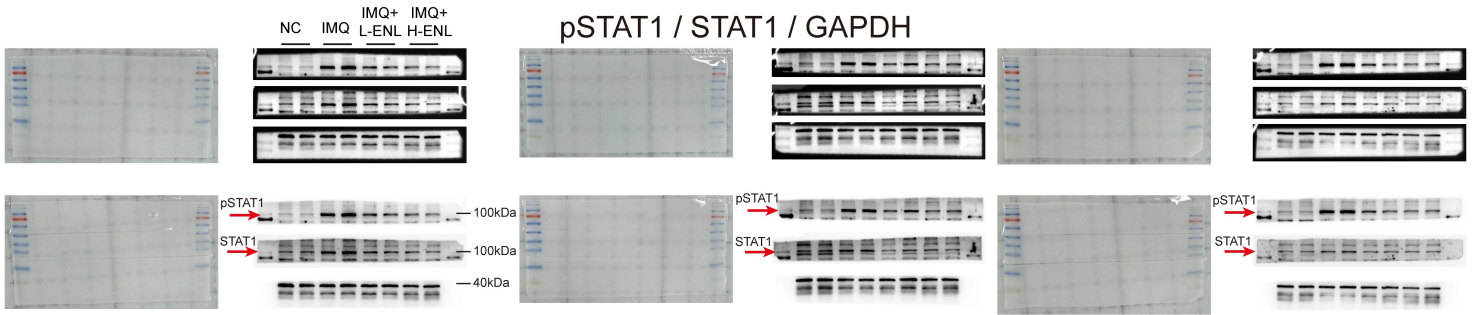

Figure5G. n=3 The arrow indicates the target protein.

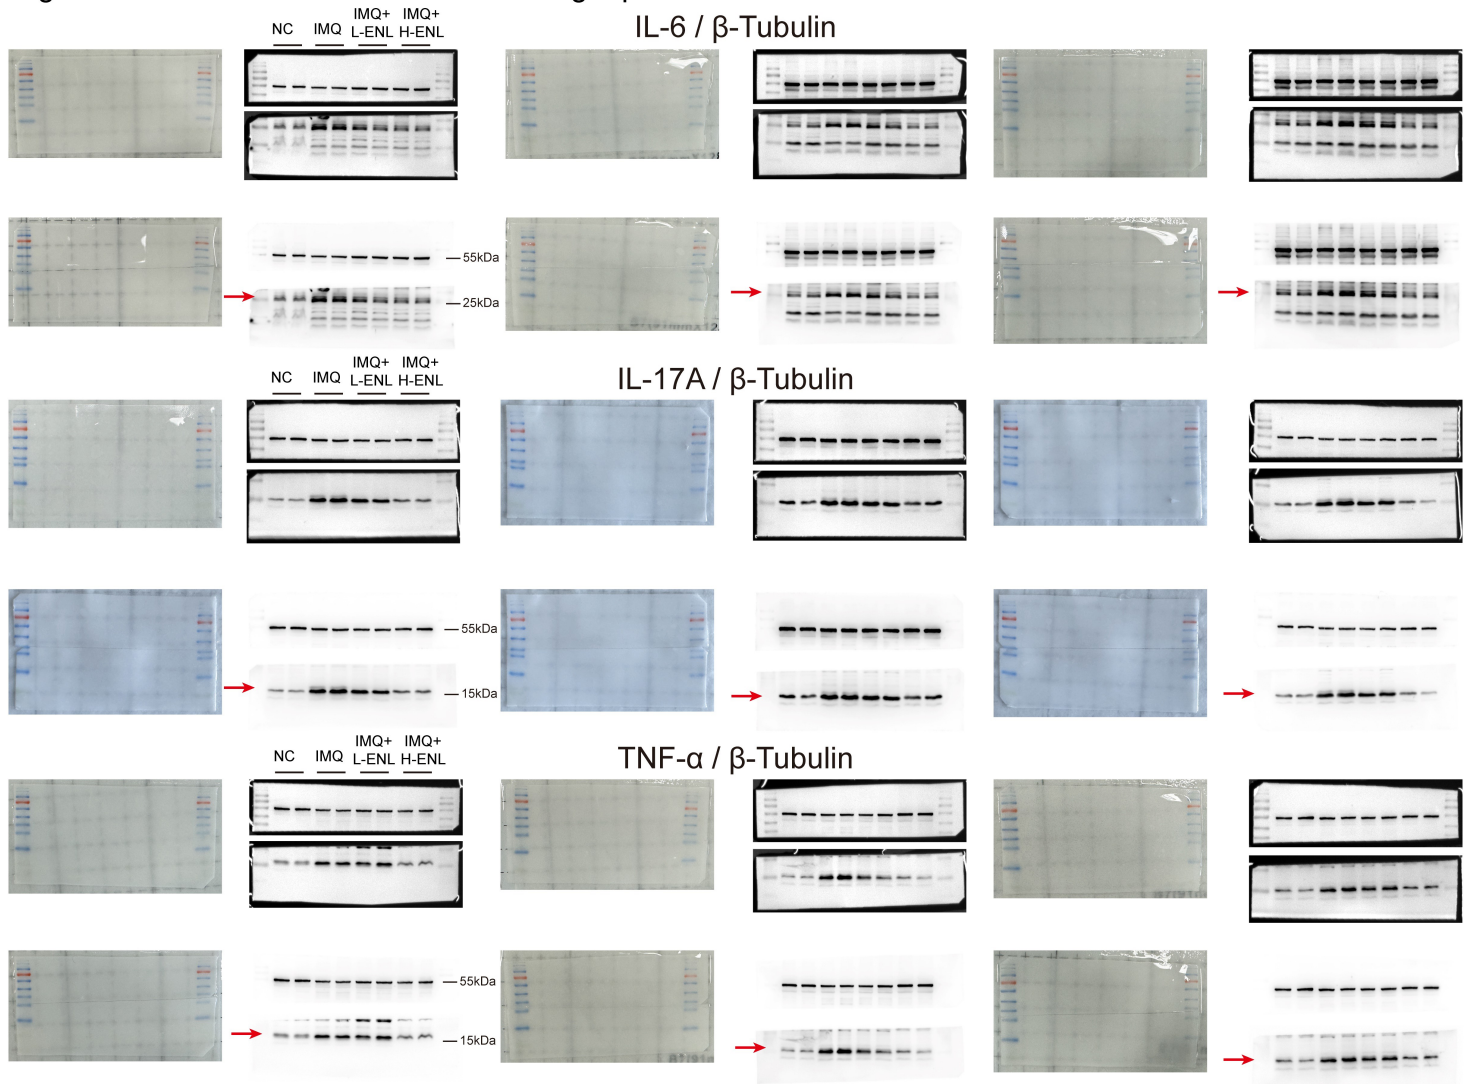

Figure5J. n=3

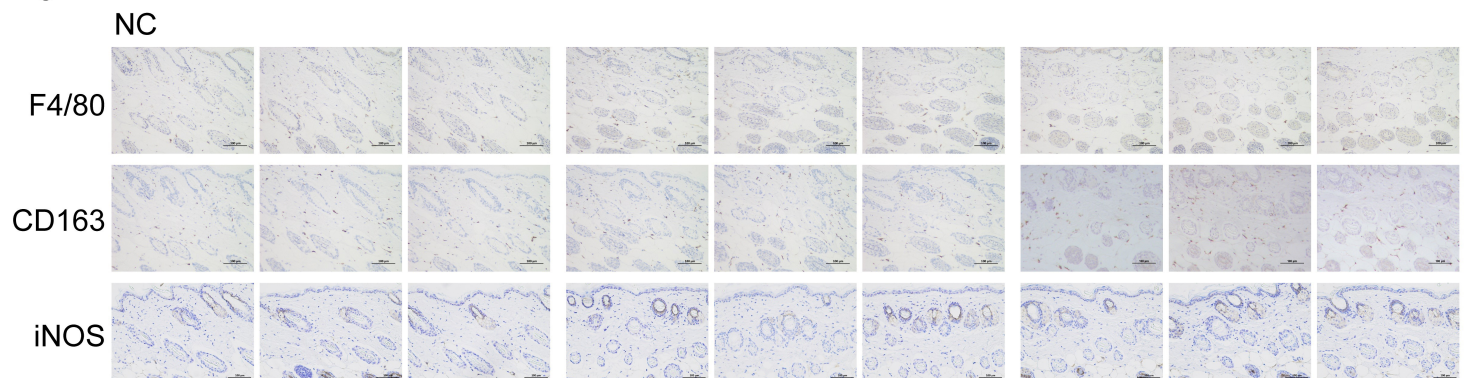

Supplement: d5fo04965b12.pdf [file d5fo04965b12.pdf]
