# Supplementary material
Source: Royal Society of Chemistry journal article supplement (doi:10.1039/d5fo04965b)

Figure 1B. n=6

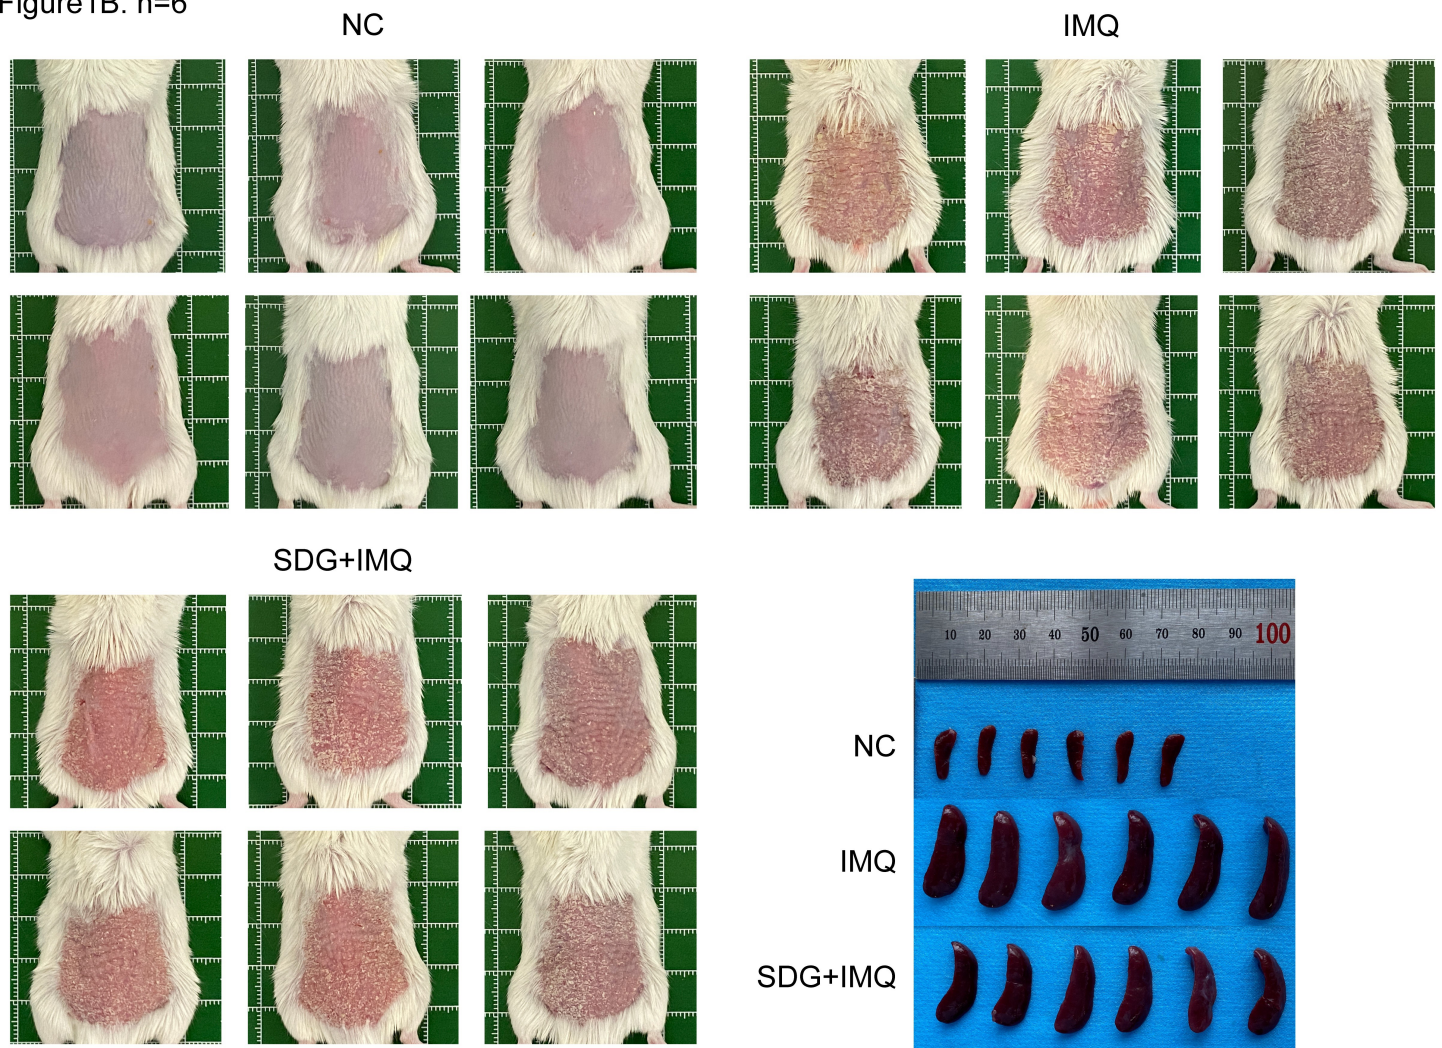

Figure 1H. n=5

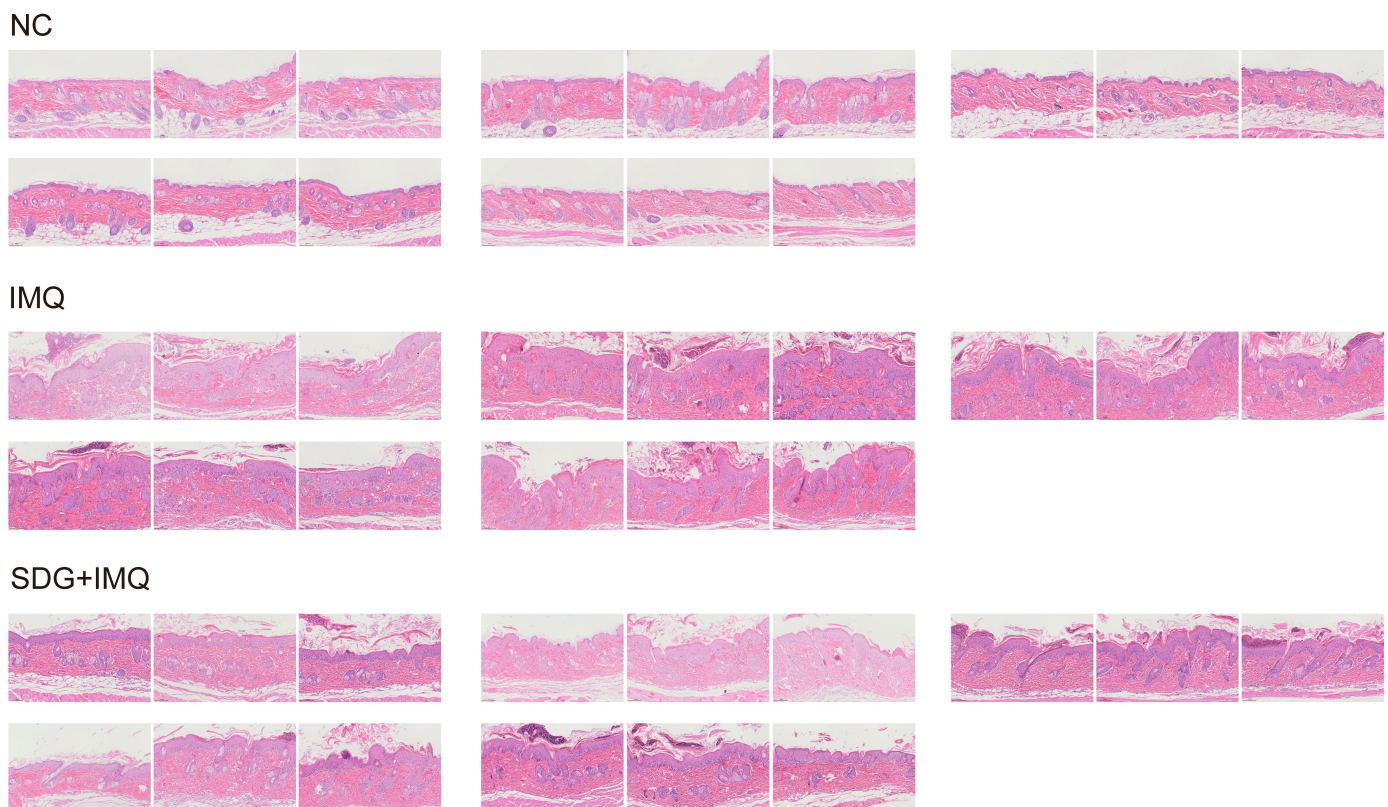

Supplement: d5fo04965b1.pdf [file d5fo04965b1.pdf]

Figure4K. n=3 The arrow indicates the target protein.

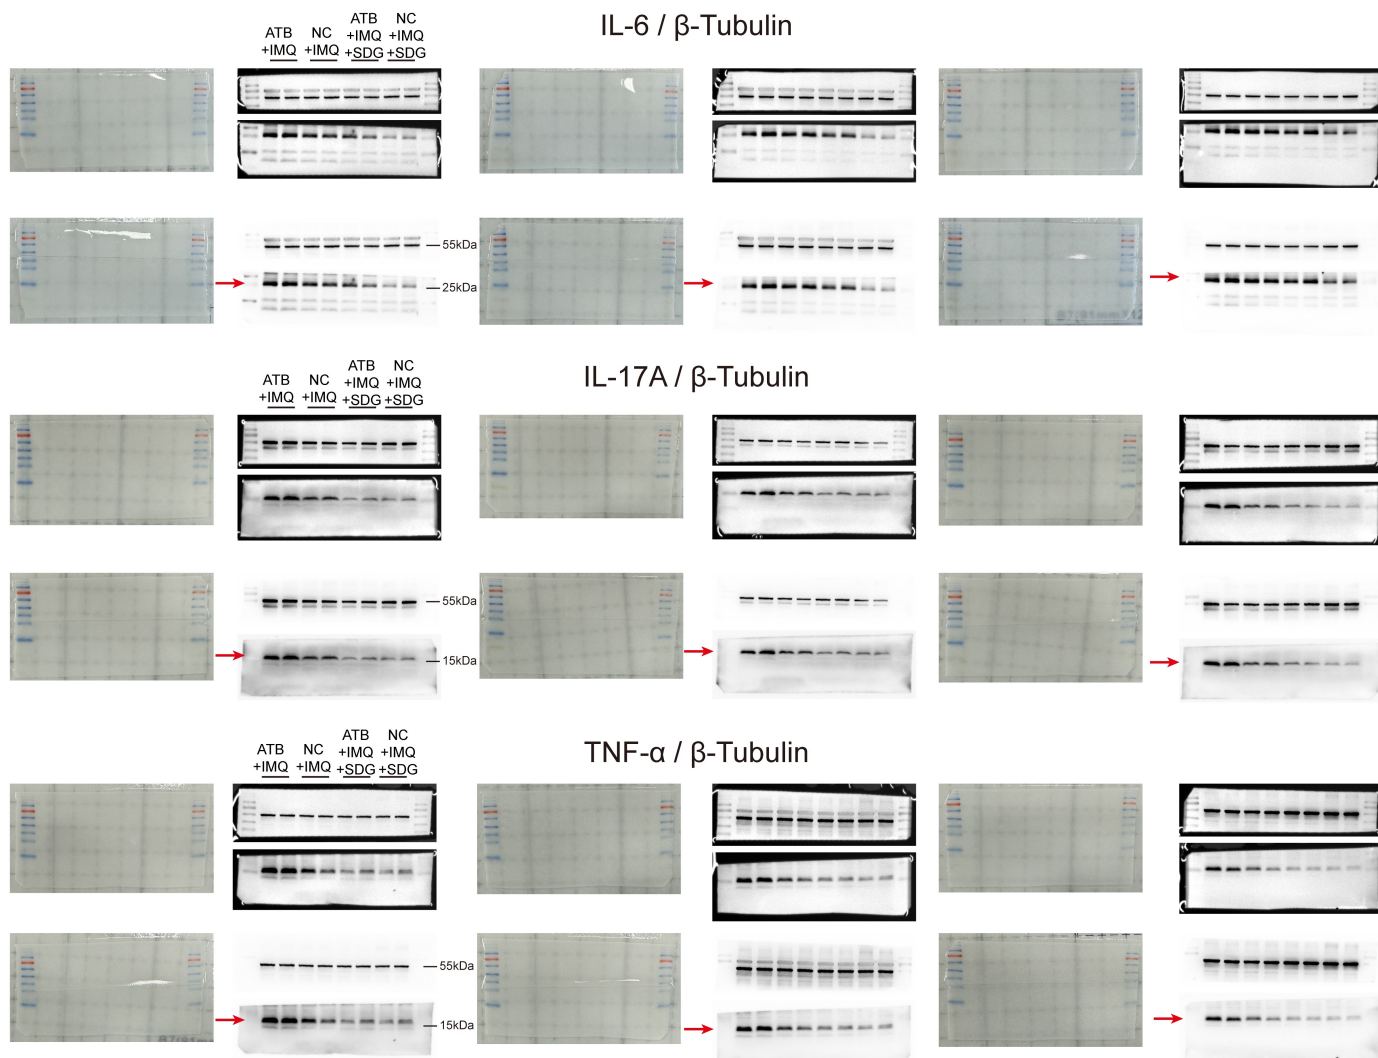

Supplement: d5fo04965b10.pdf [file d5fo04965b10.pdf]

Figure 5A. n=6

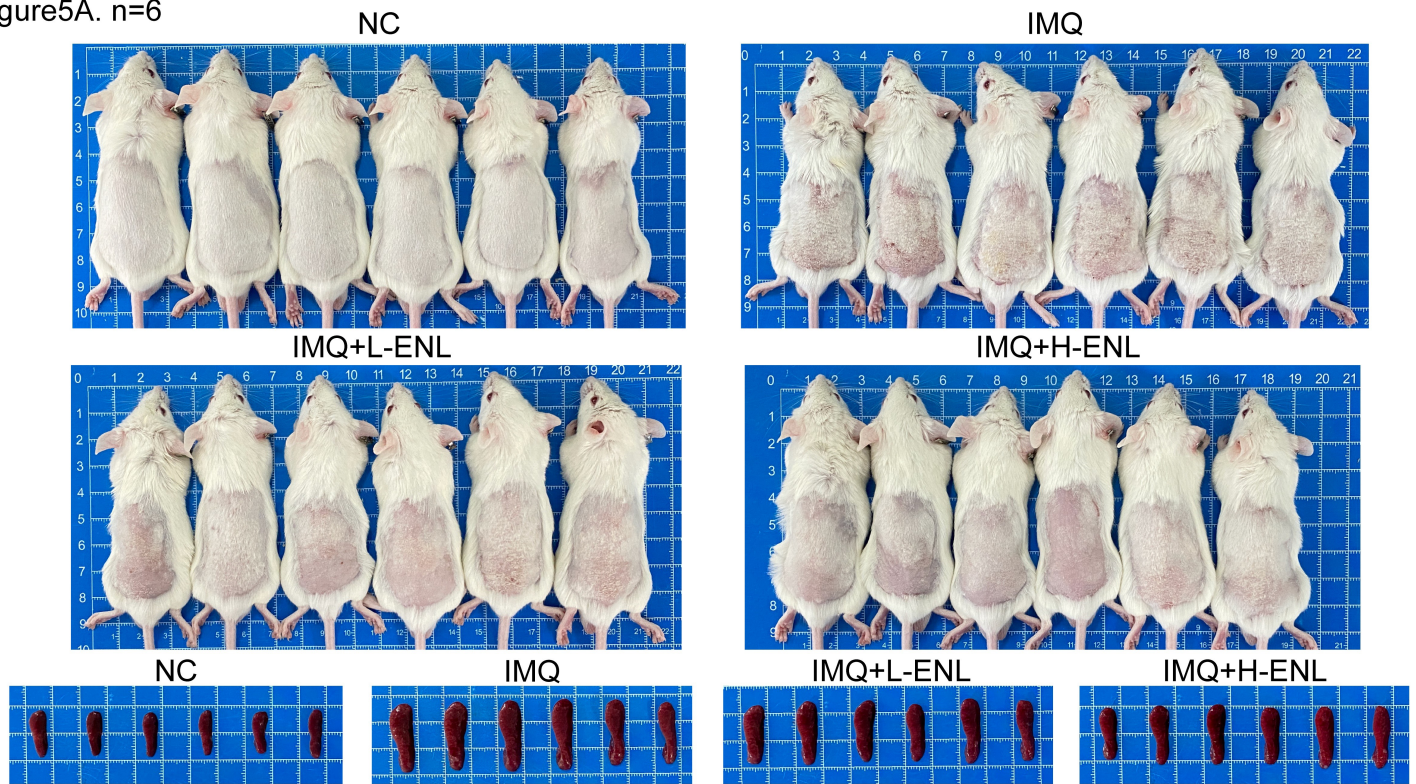

Figure 5D. H&E, n=5 Ki67, n=3

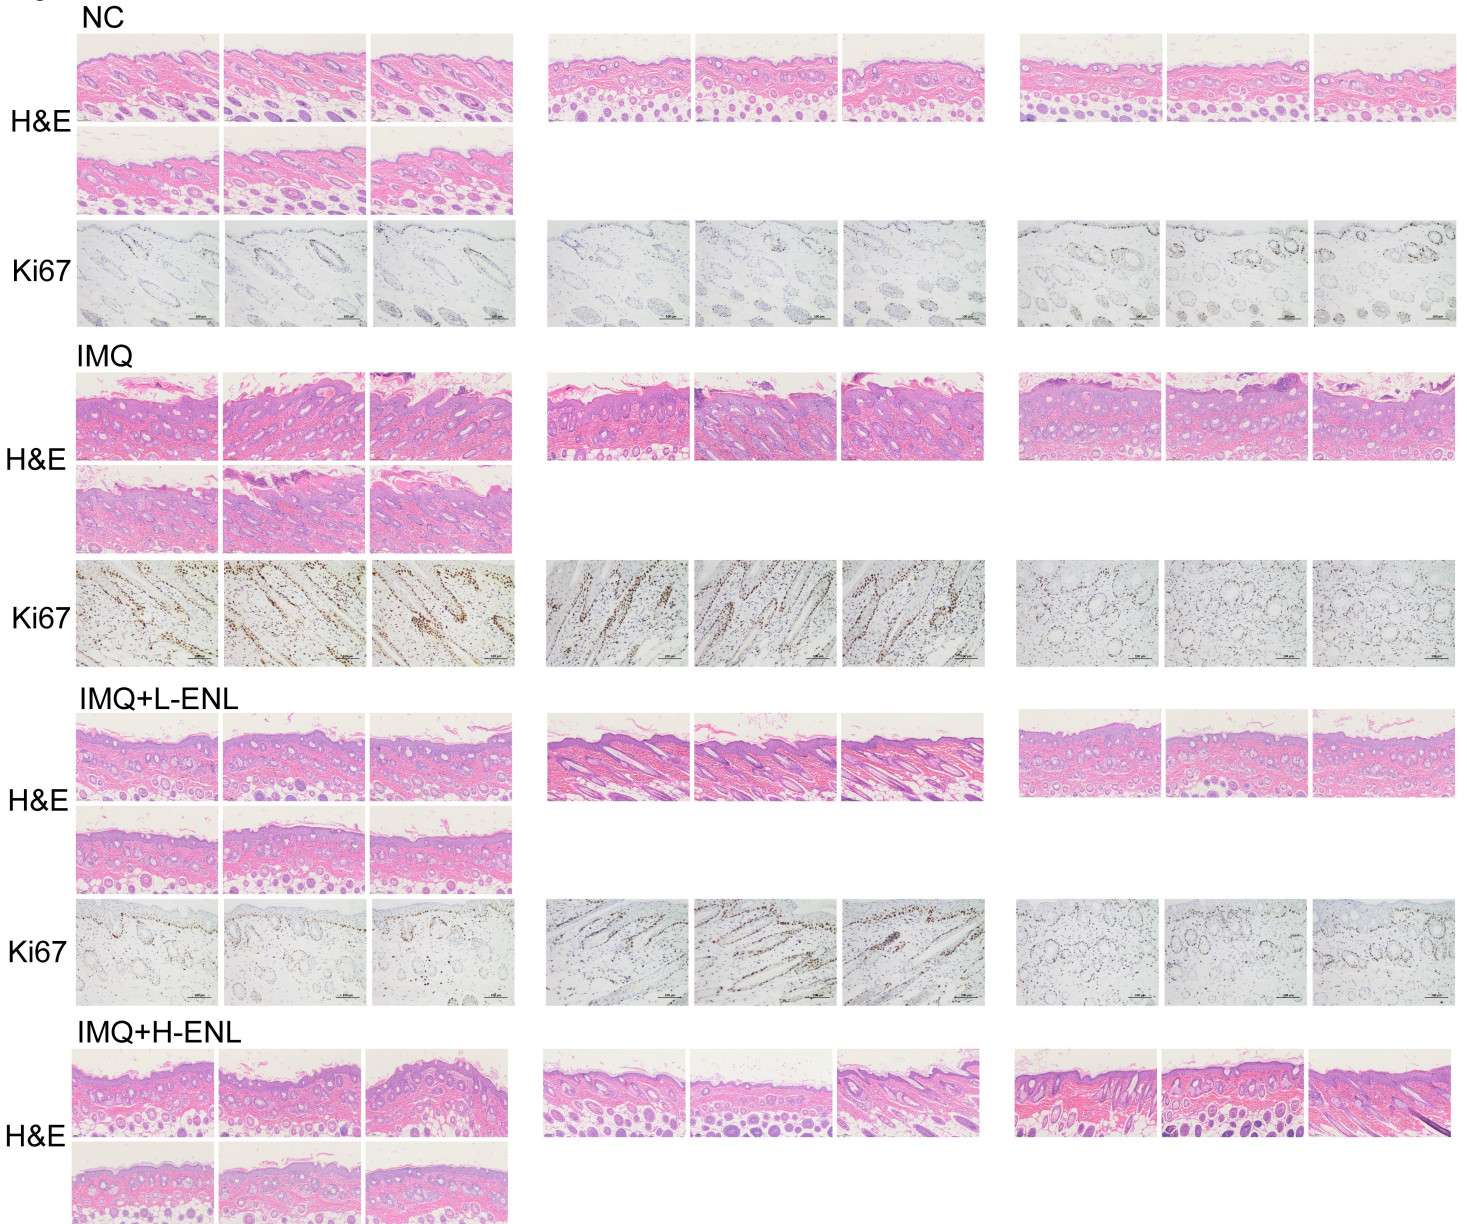

Supplement: d5fo04965b11.pdf [file d5fo04965b11.pdf]

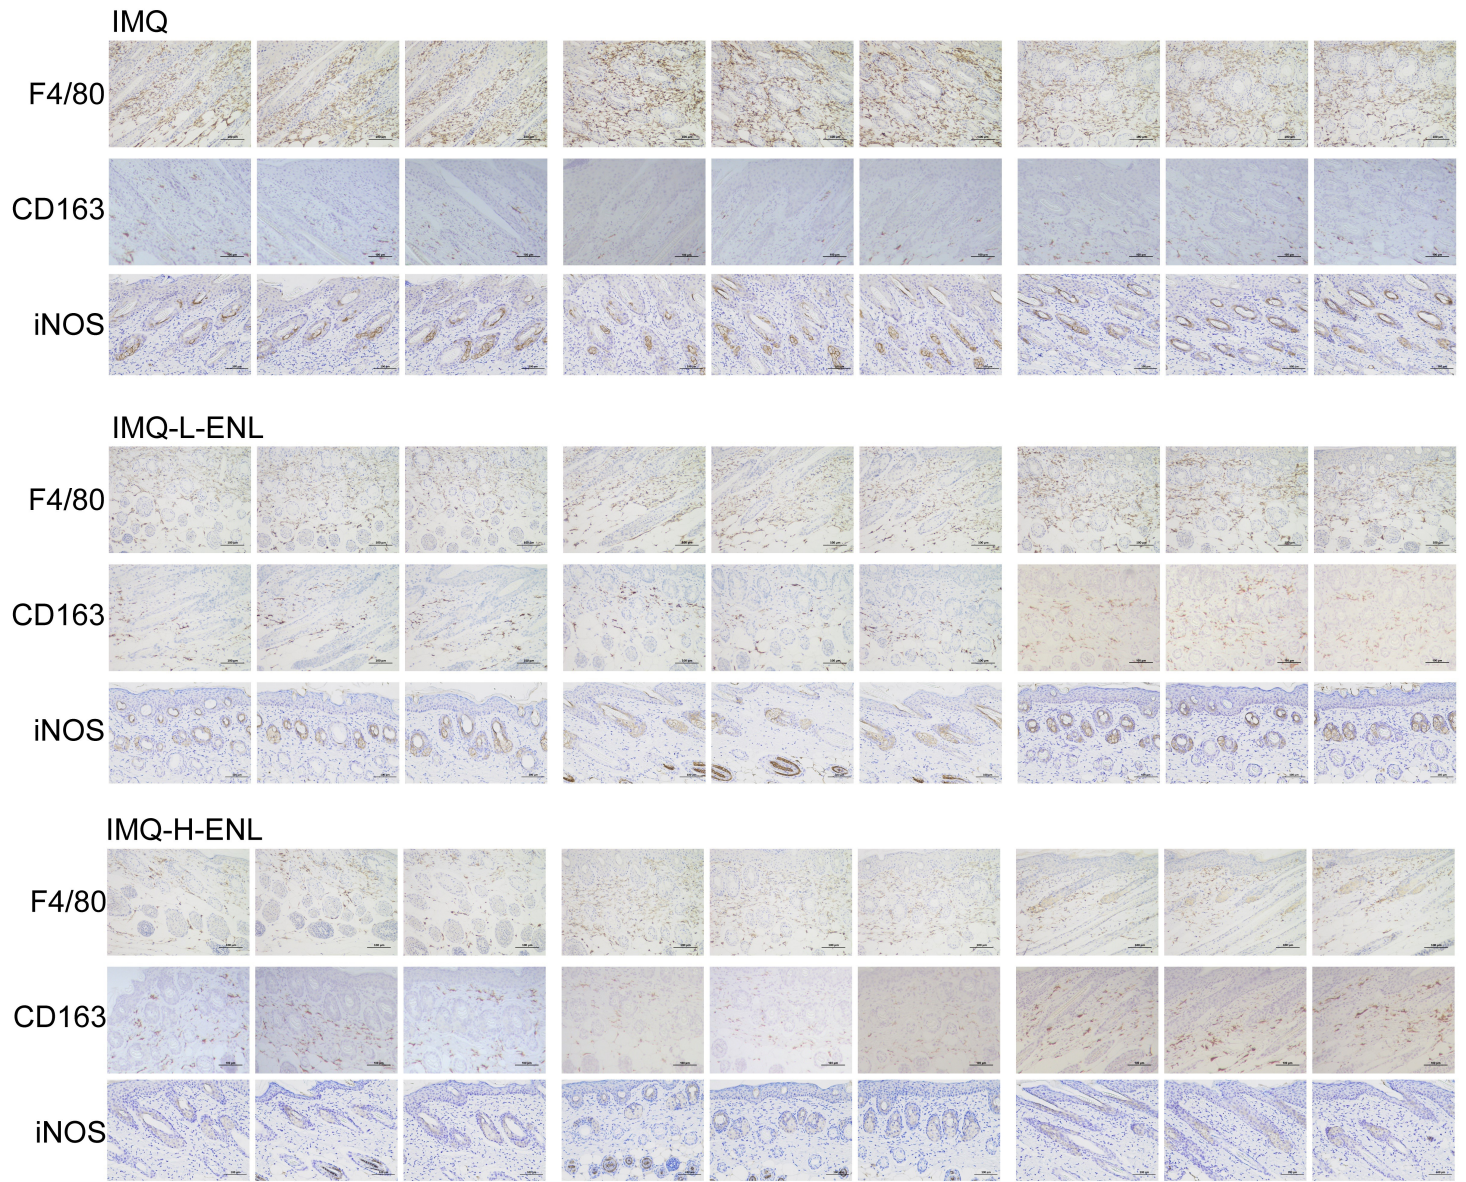

Figure5K n=3

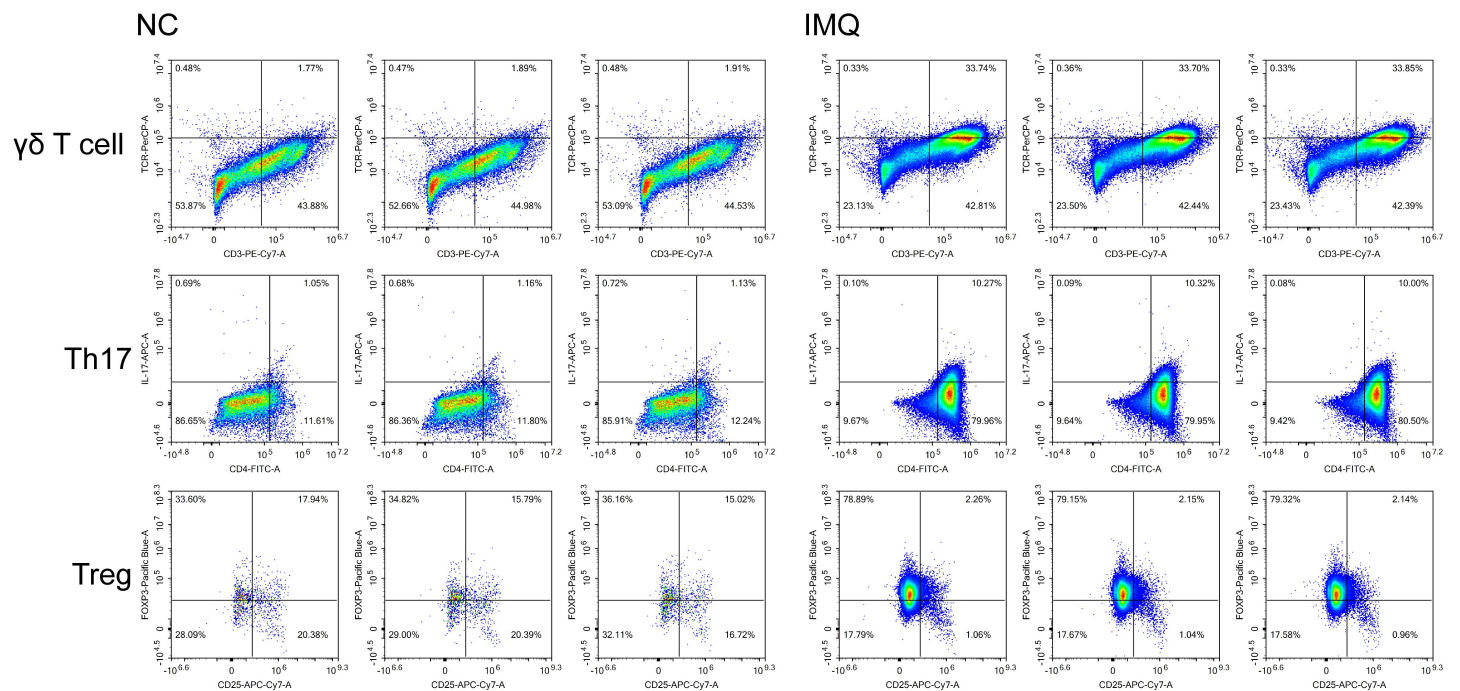

Supplement: d5fo04965b13.pdf [file d5fo04965b13.pdf]

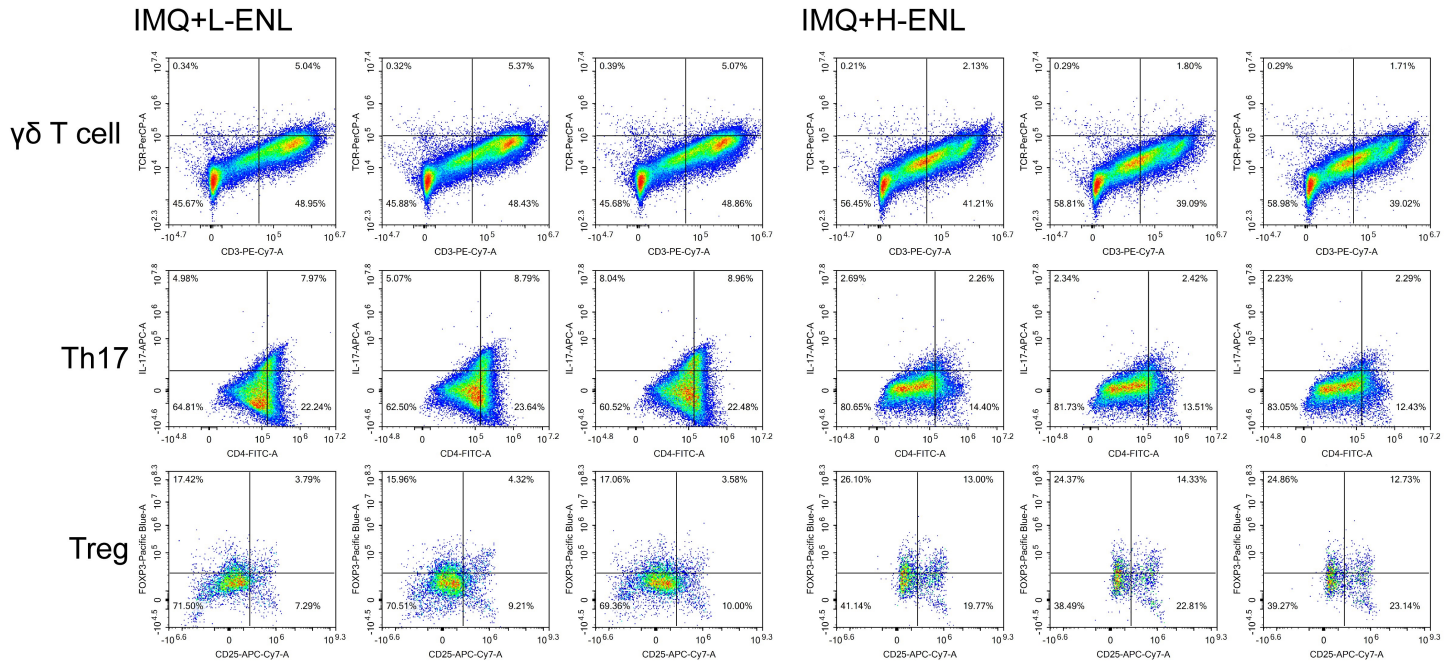

Figure5L n=3

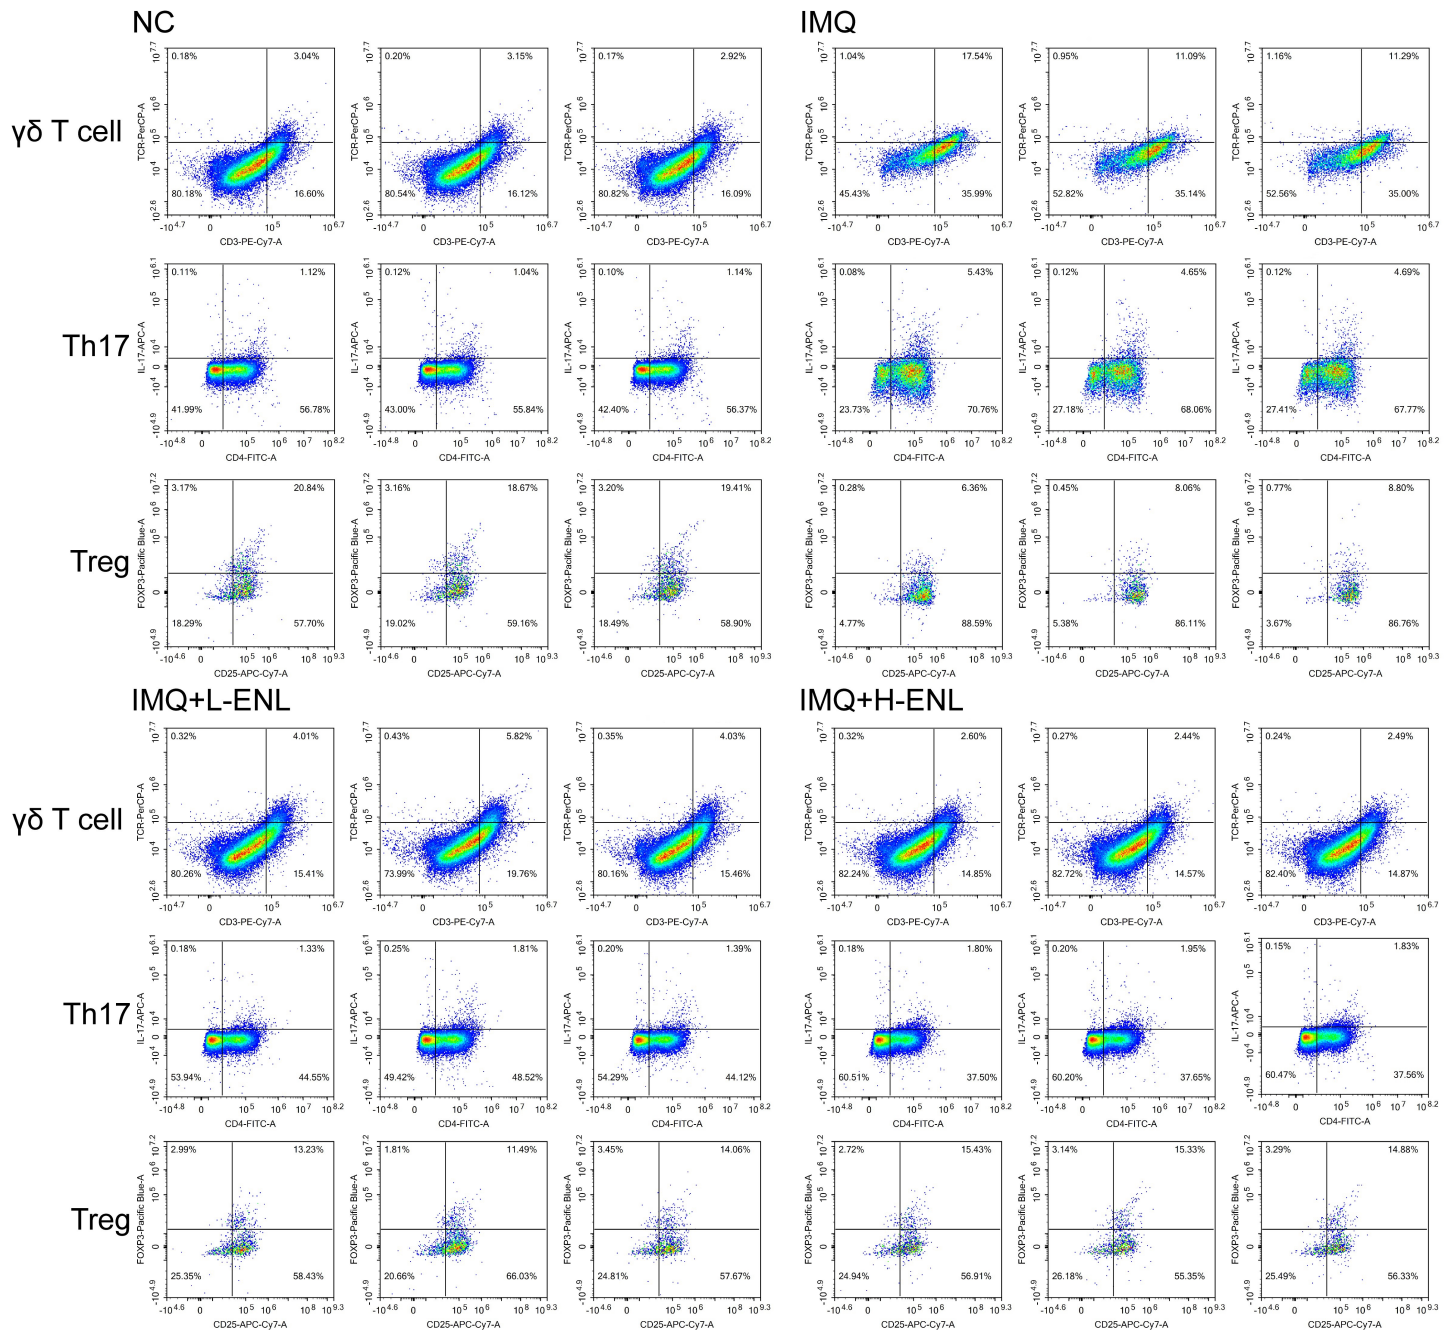

Supplement: d5fo04965b14.pdf [file d5fo04965b14.pdf]

Figure6. n=3 The arrow indicates the target protein.

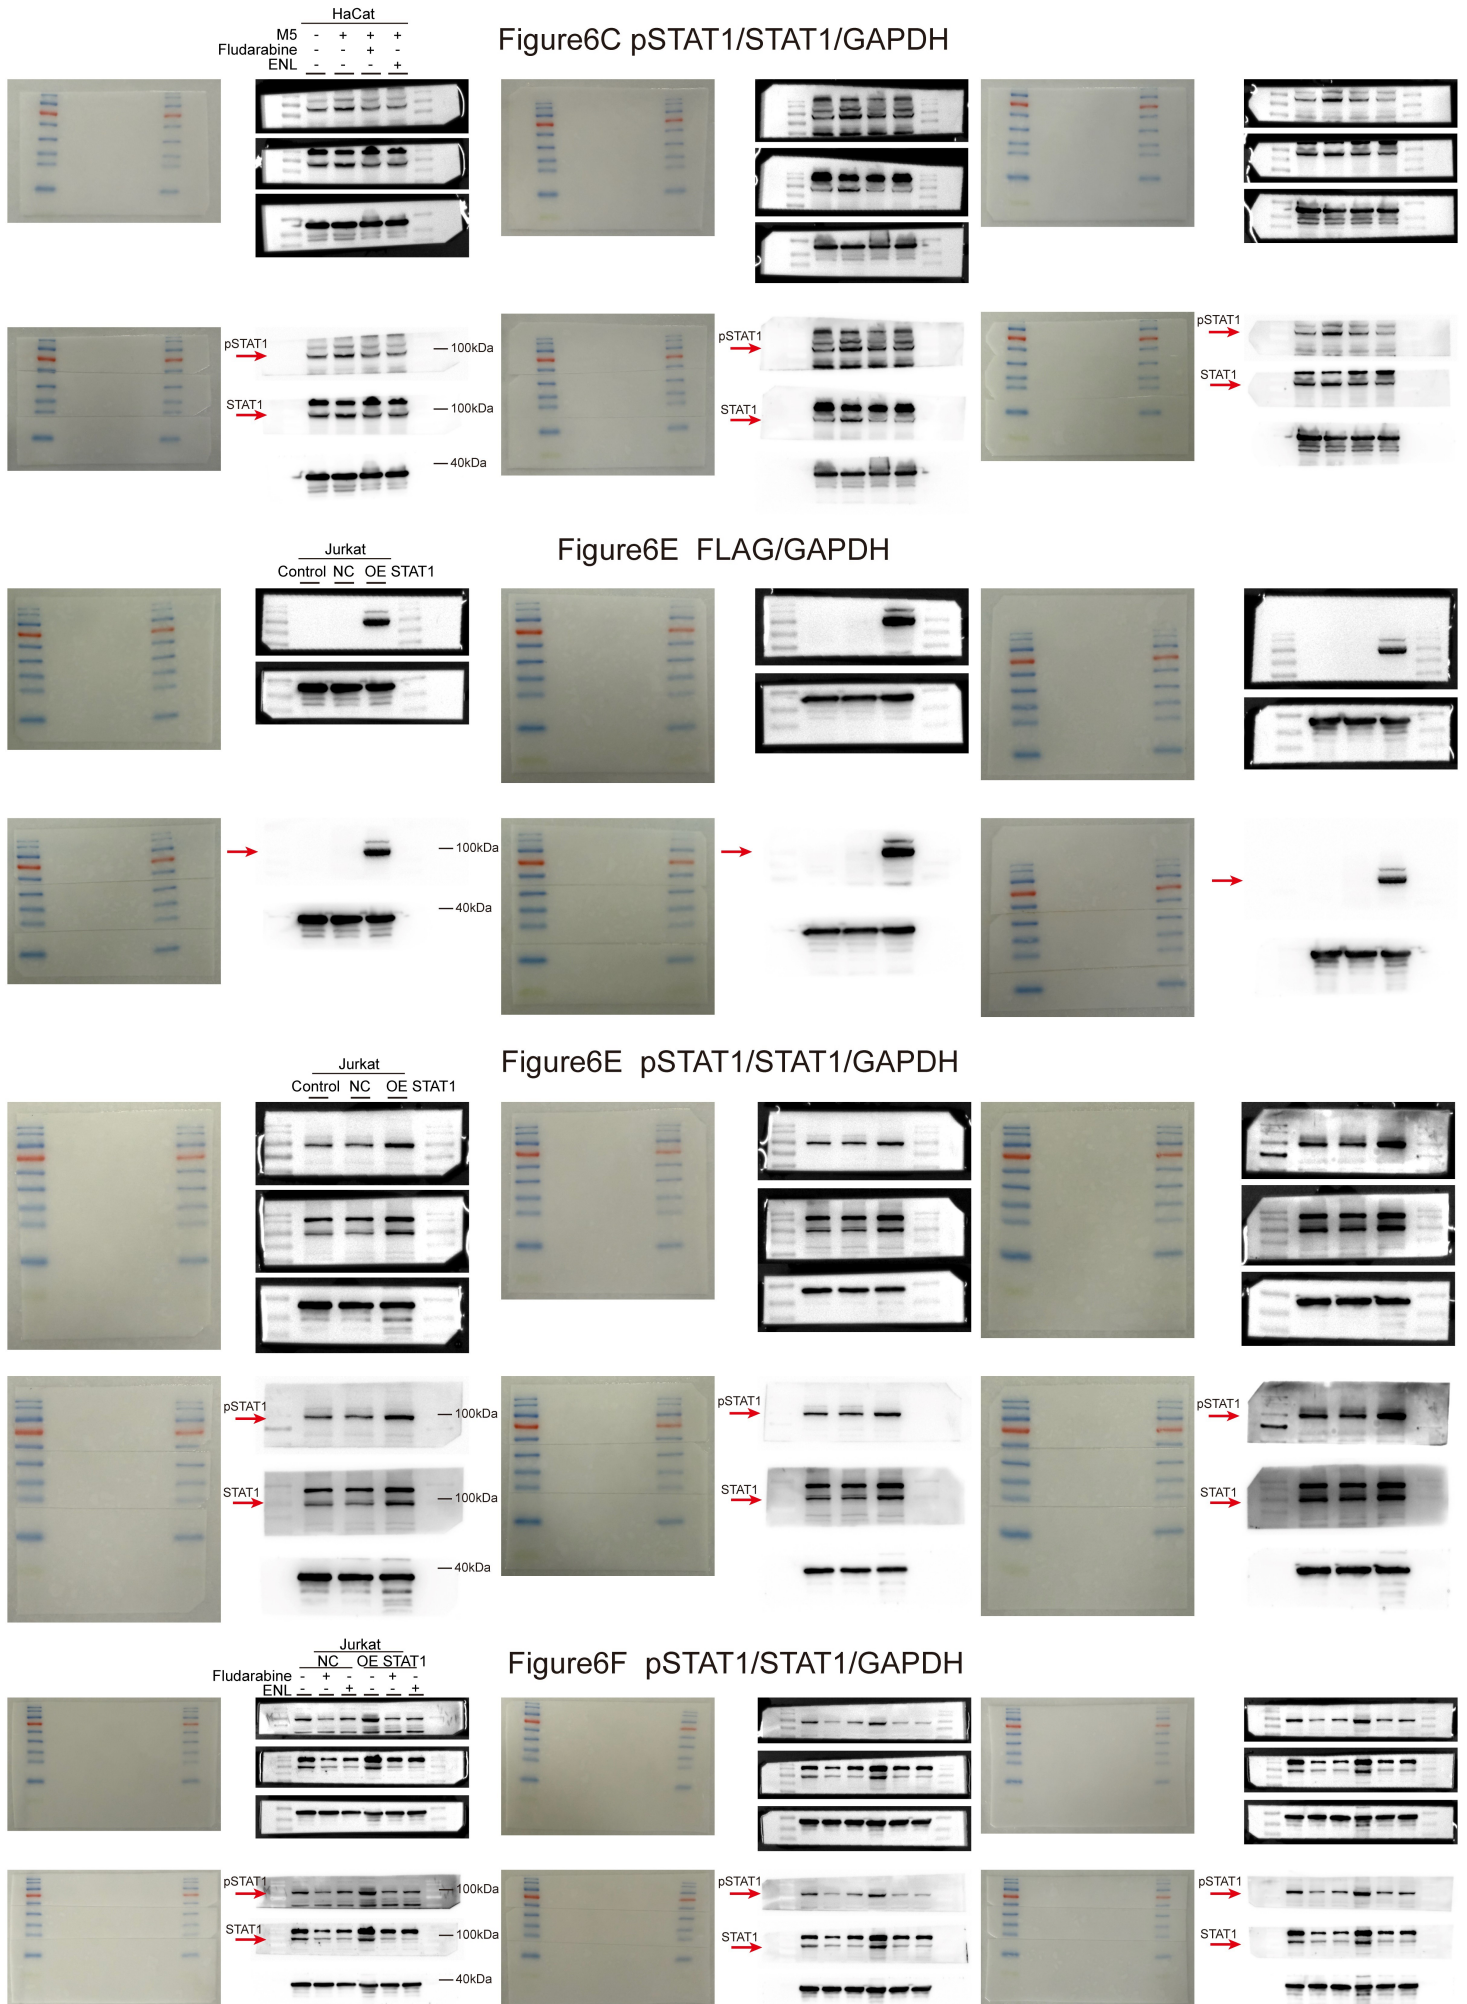

Supplement: d5fo04965b15.pdf [file d5fo04965b15.pdf]

Figure1I. n=3

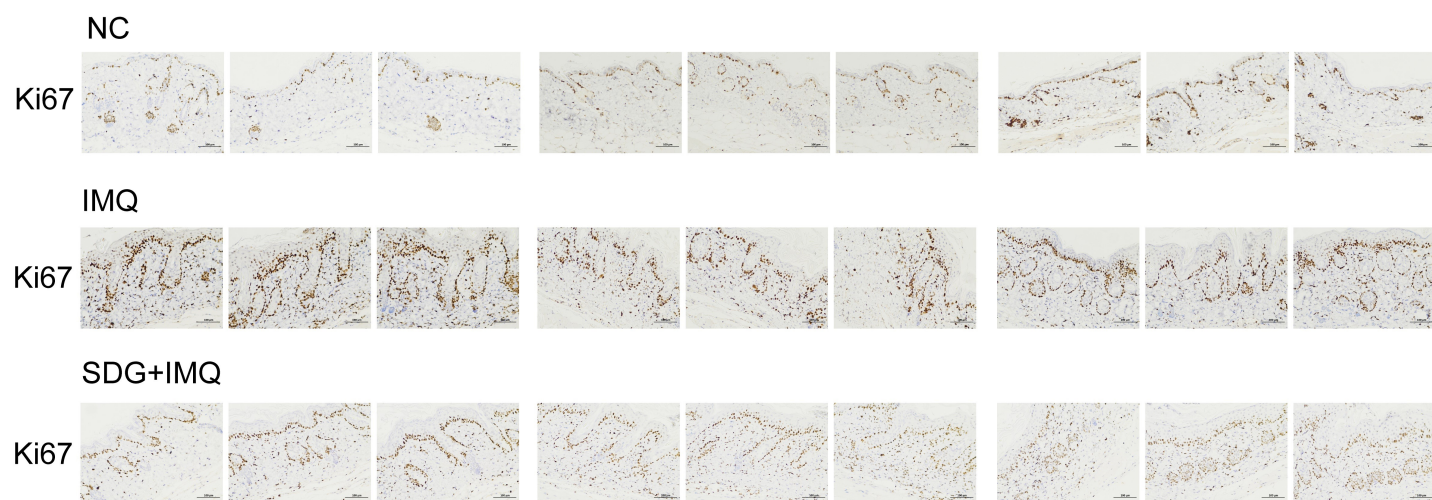

Figure1J. n=3

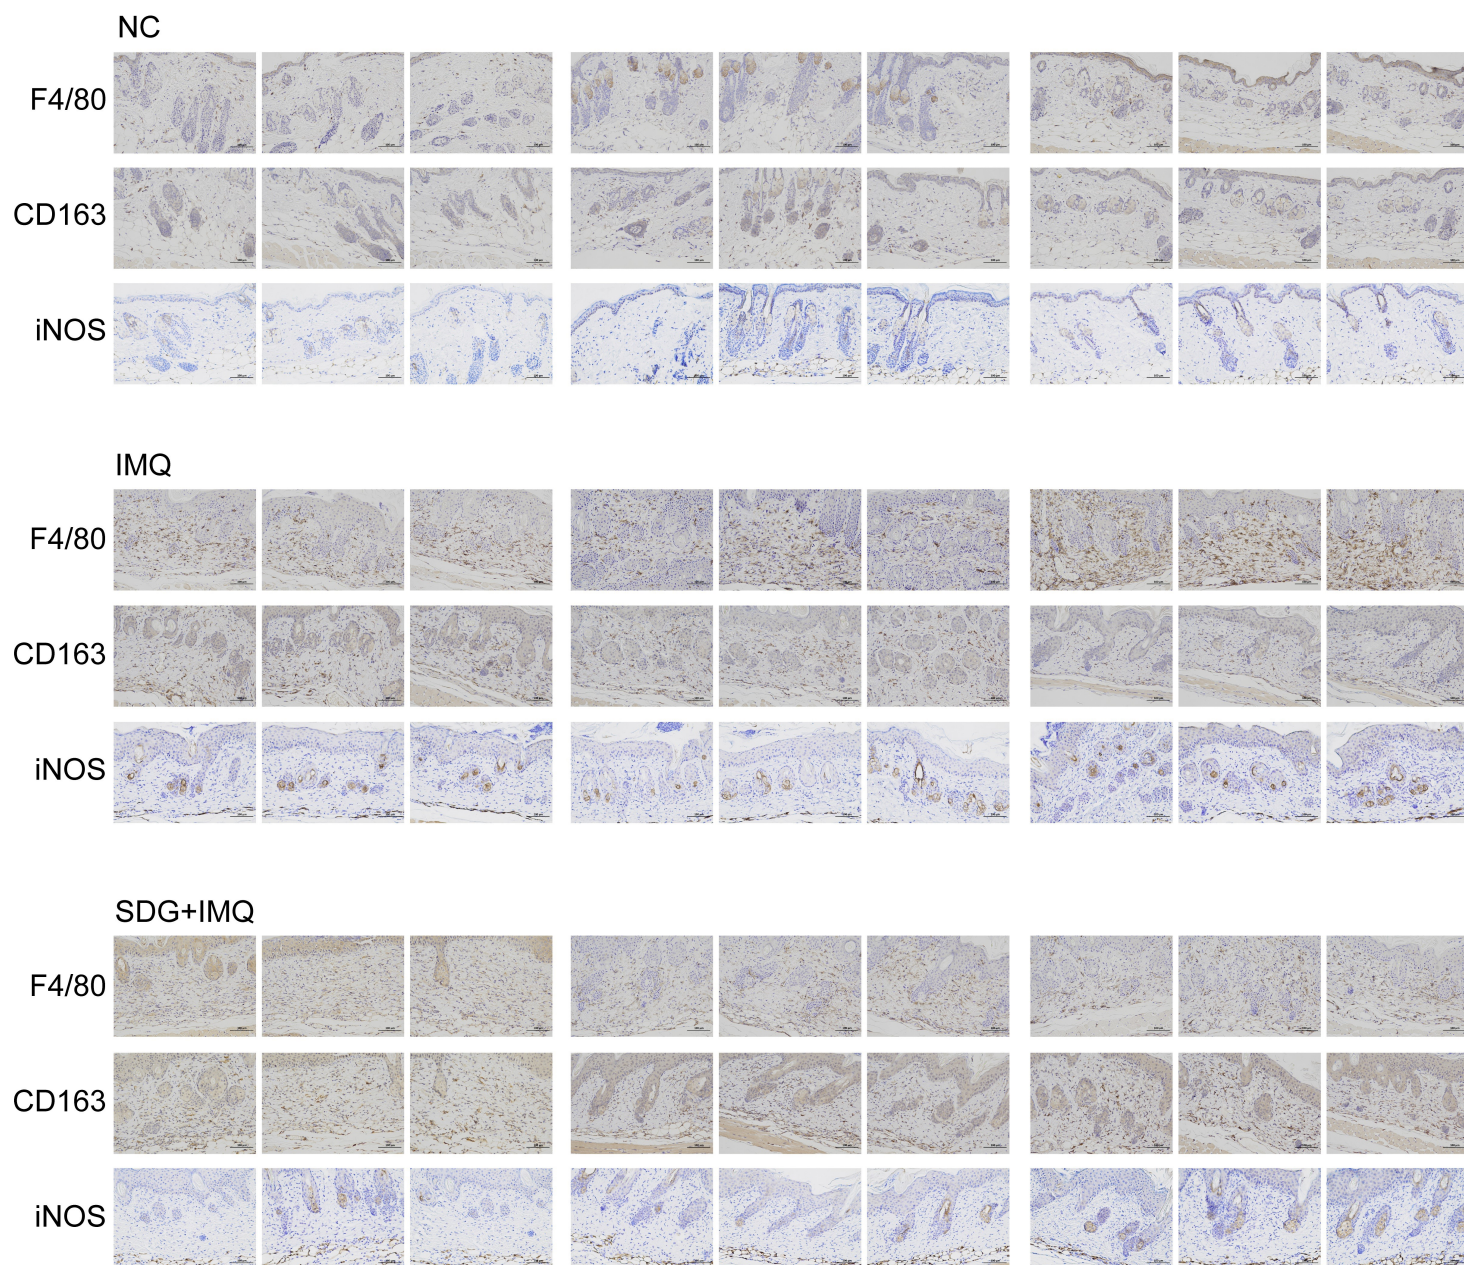

Supplement: d5fo04965b2.pdf [file d5fo04965b2.pdf]

Figure 2H. n=3. The arrow indicates the target protein.

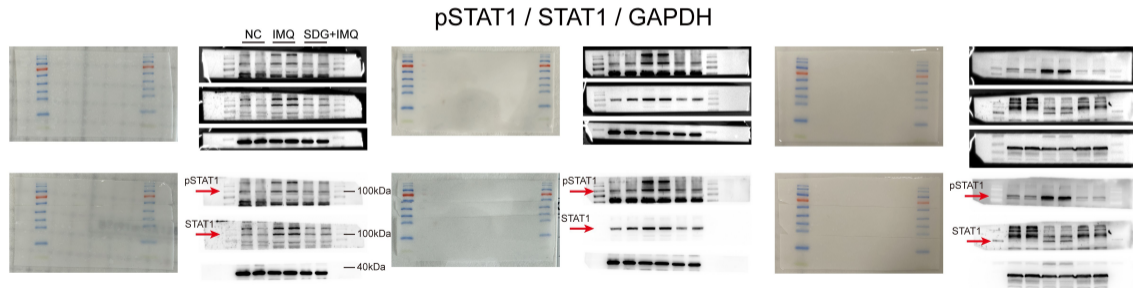

Supplement: d5fo04965b4.pdf [file d5fo04965b4.pdf]

Figure3B. n=6

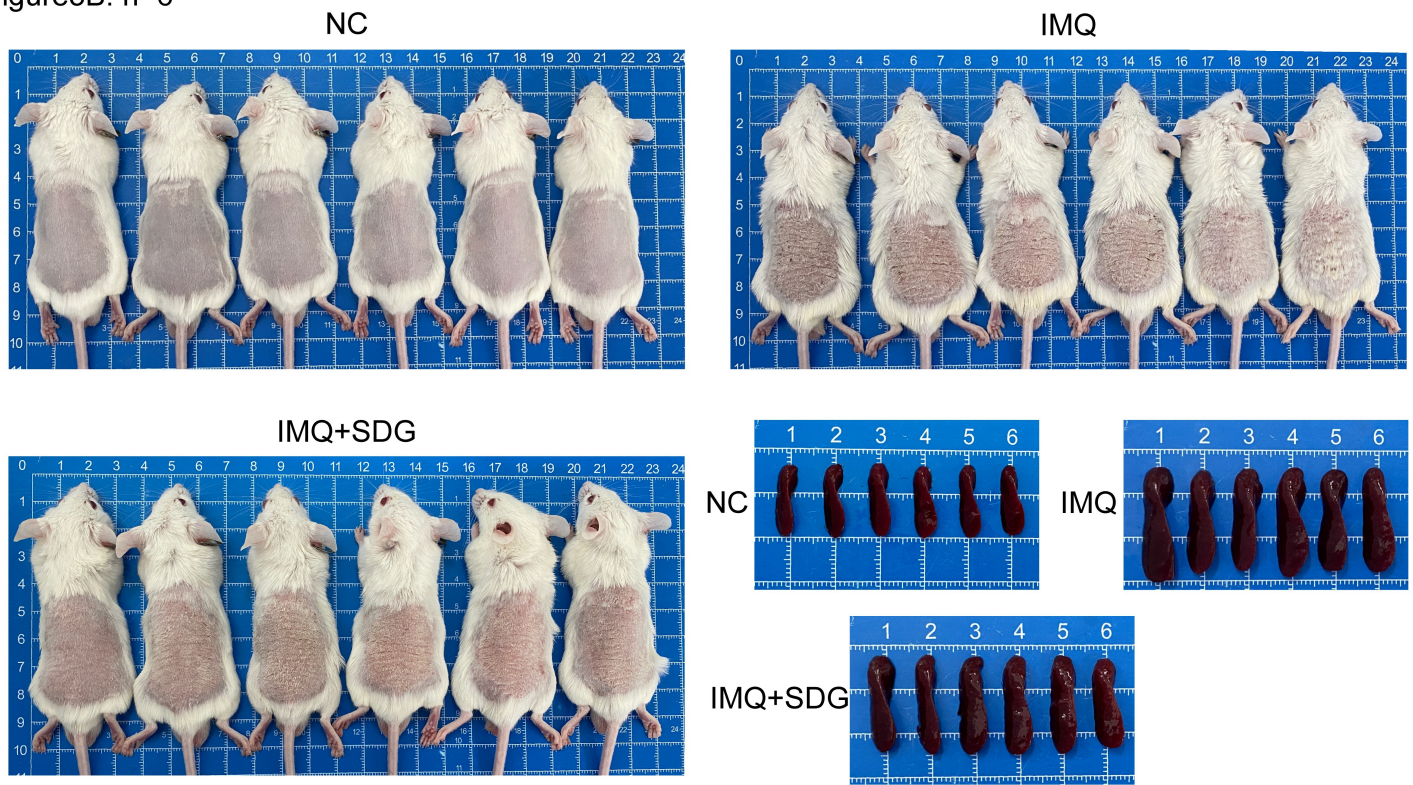

Figure3E. H&E, n=5 Ki67, n=3

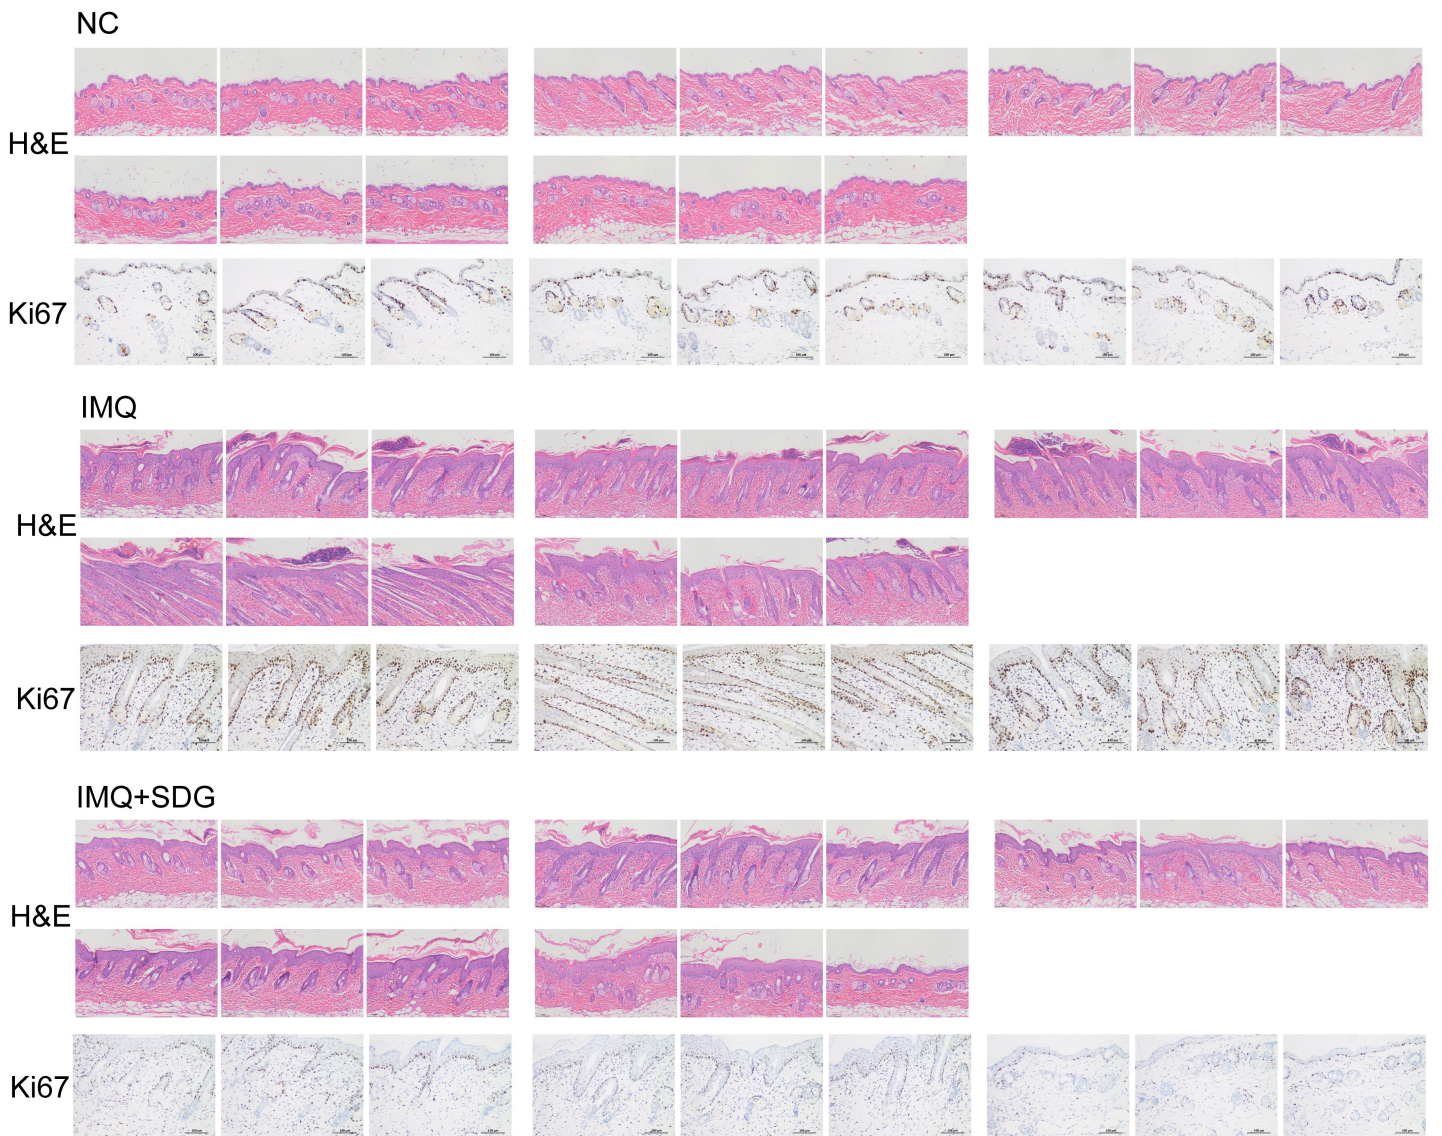

Supplement: d5fo04965b5.pdf [file d5fo04965b5.pdf]

Figure3I. n=3 The arrow indicates the target protein.

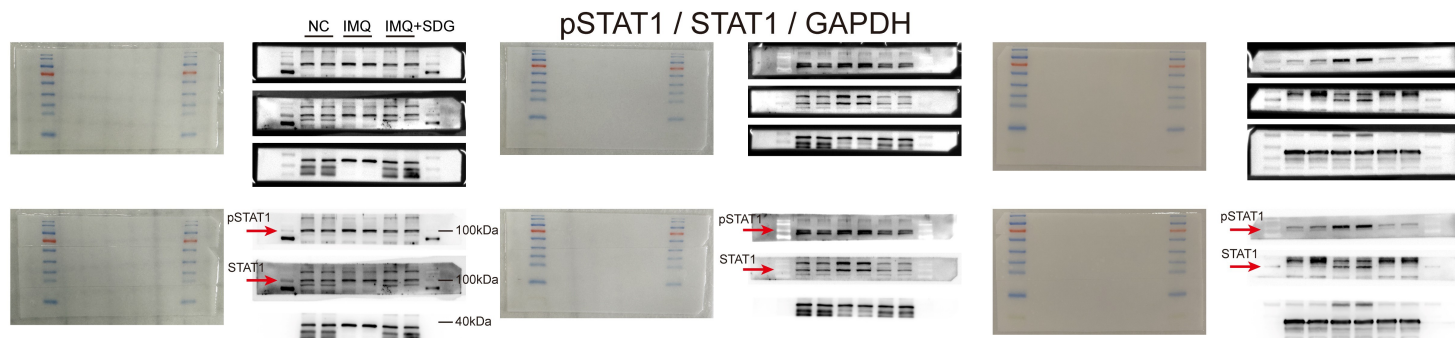

Figure3J. n=3

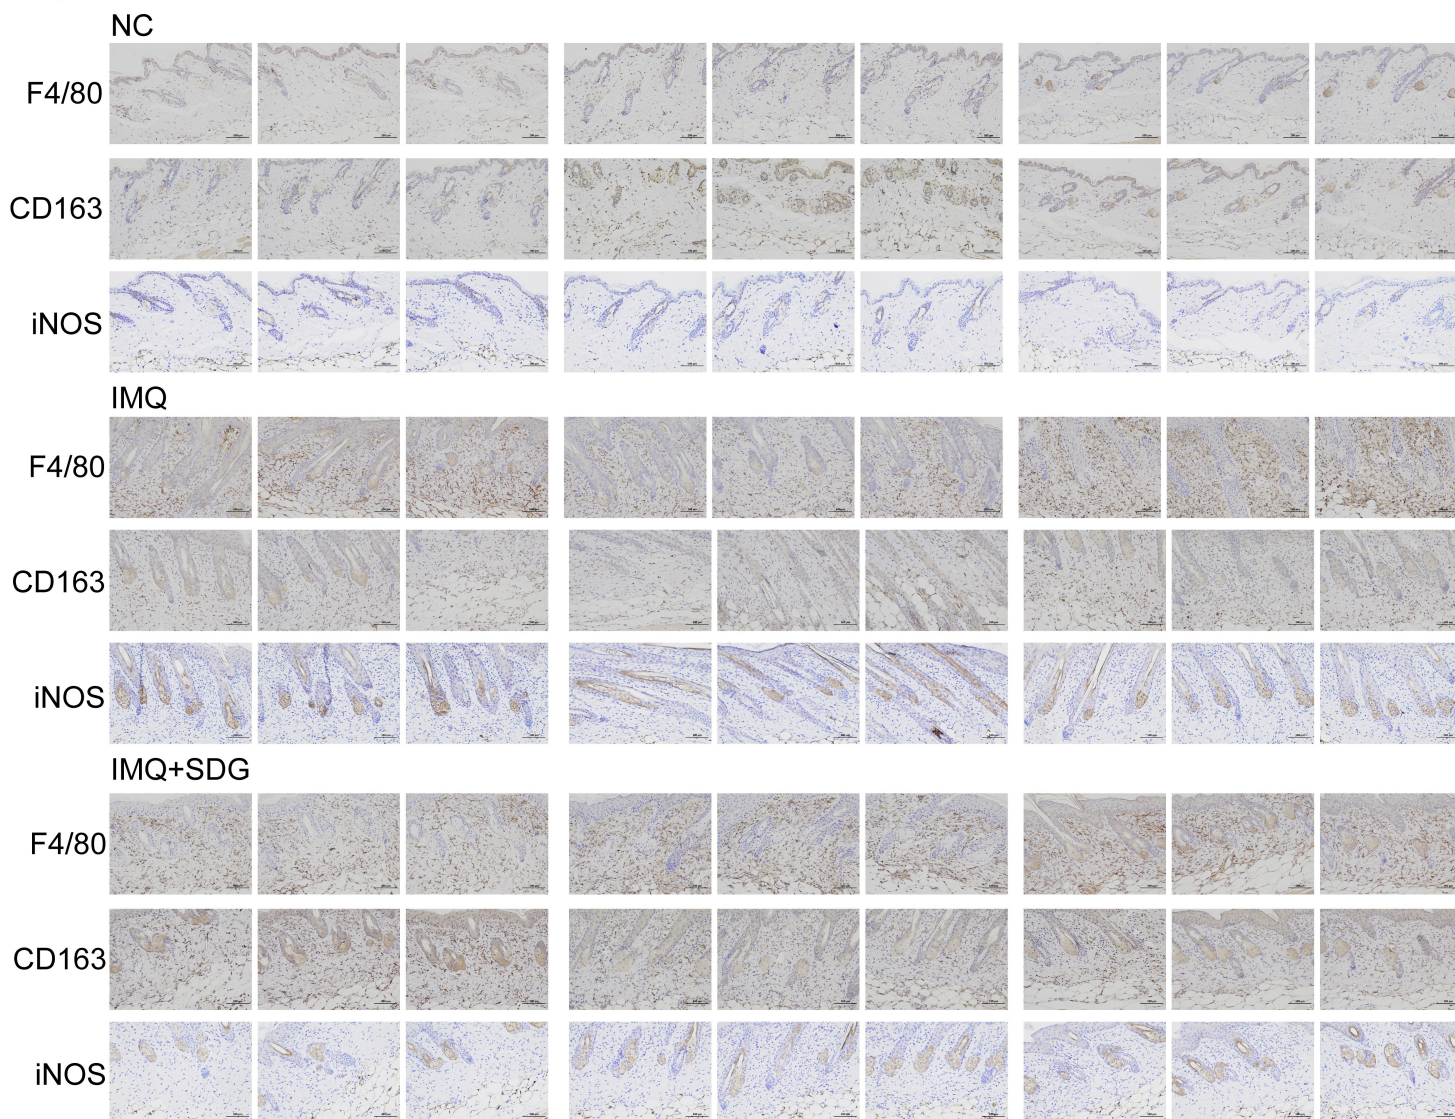

Figure3K. n=3

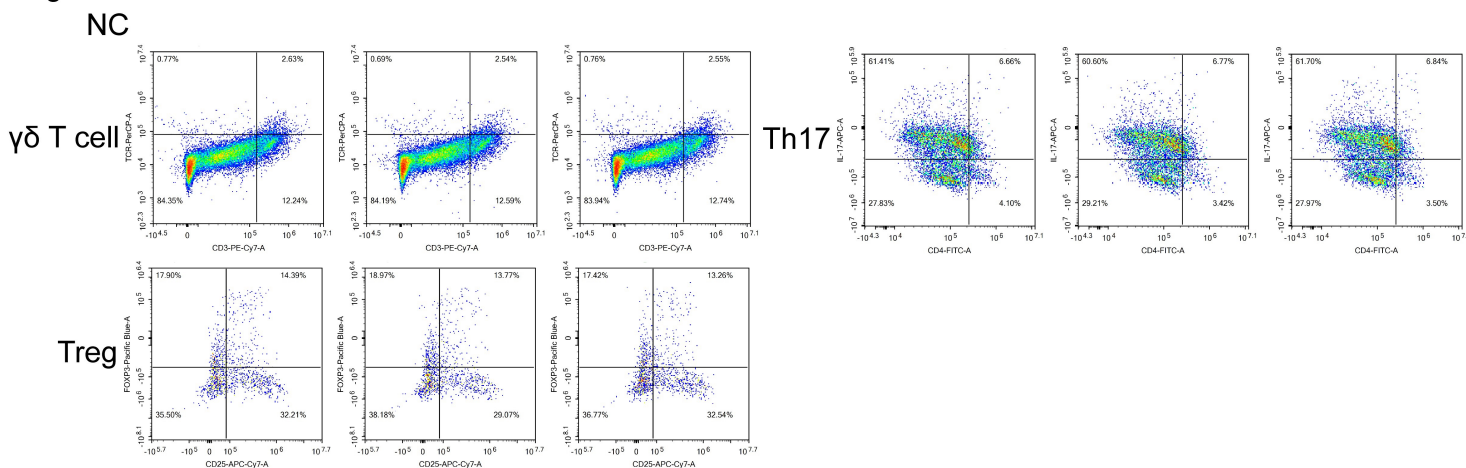

Supplement: d5fo04965b6.pdf [file d5fo04965b6.pdf]

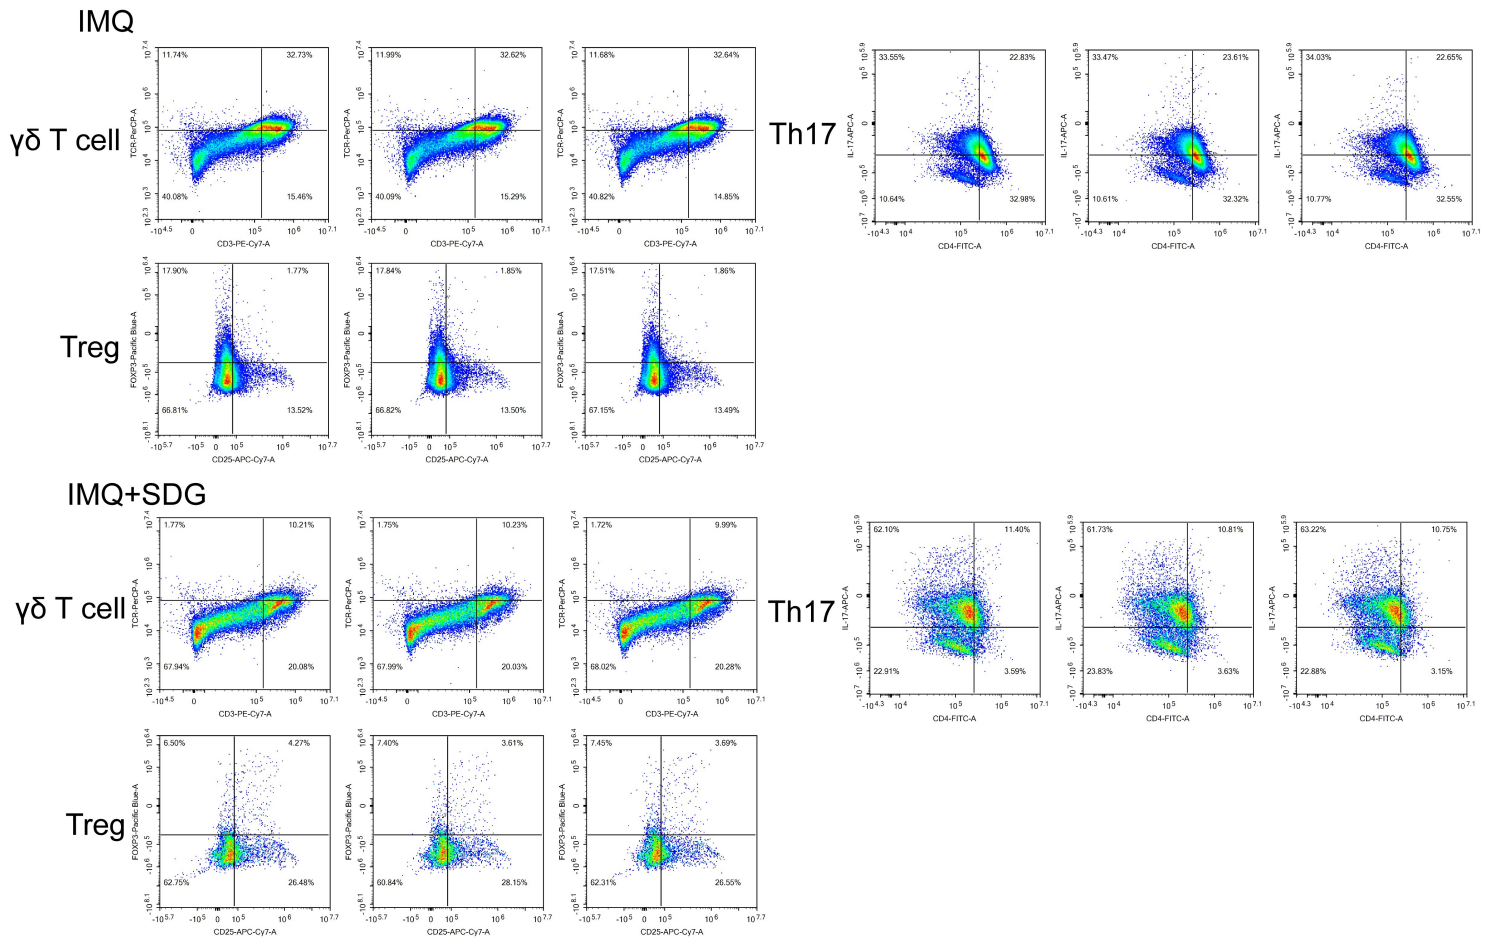

Figure3L. n=3 The arrow indicates the target protein.

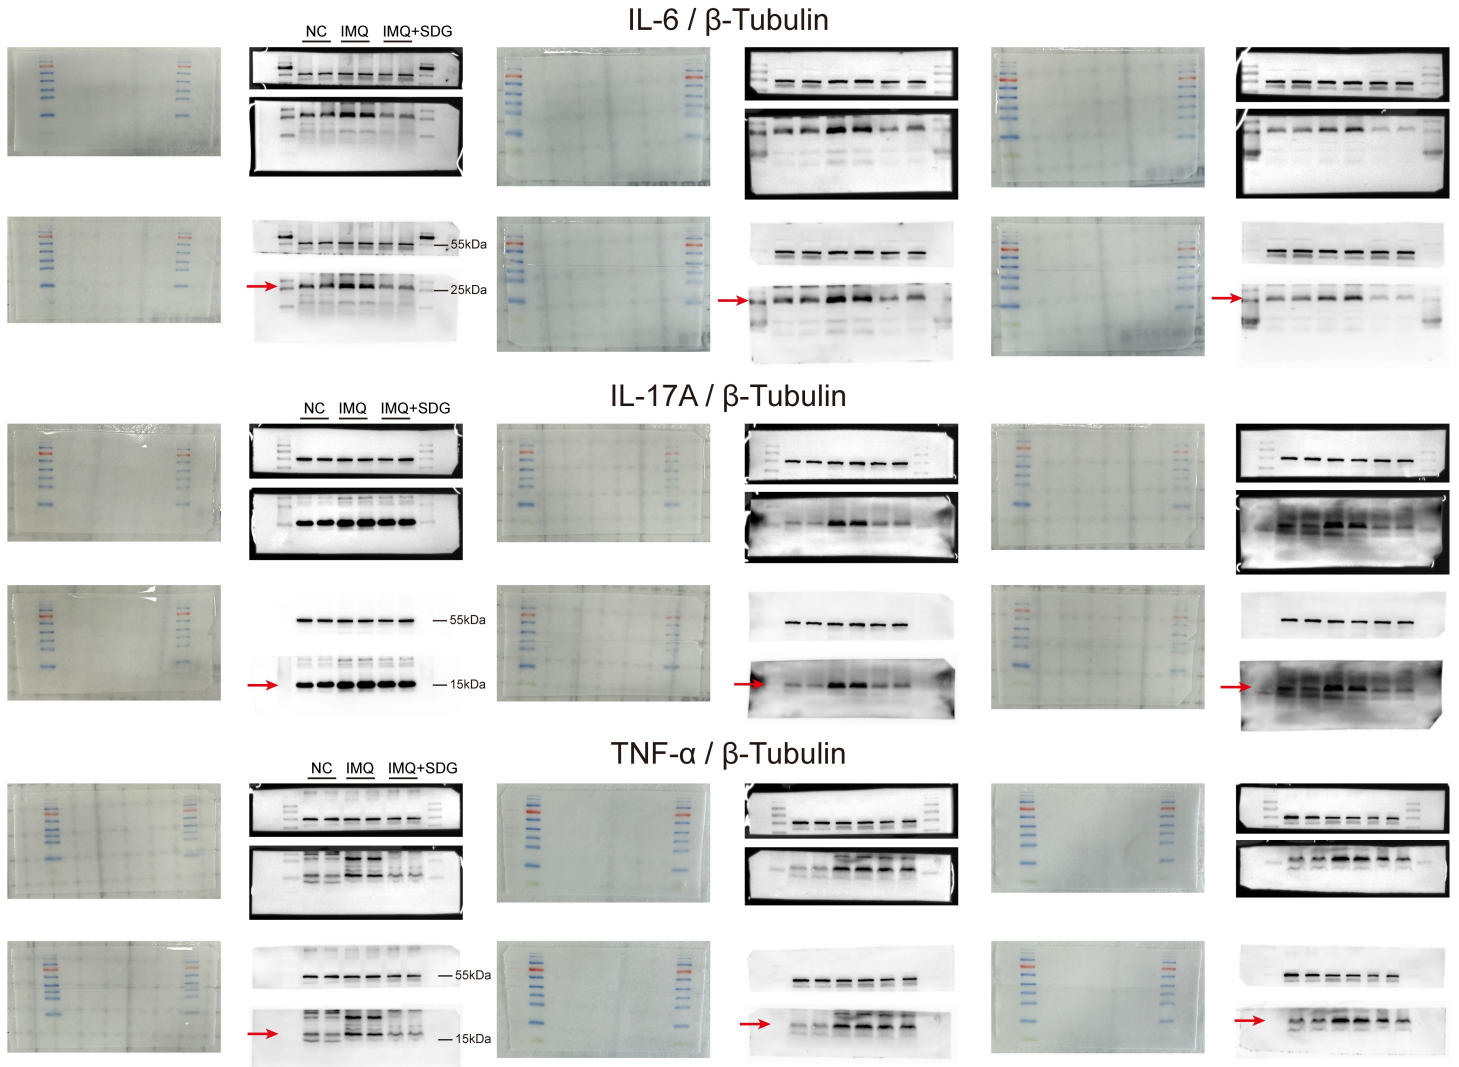

Supplement: d5fo04965b7.pdf [file d5fo04965b7.pdf]

Figure4B. n=6

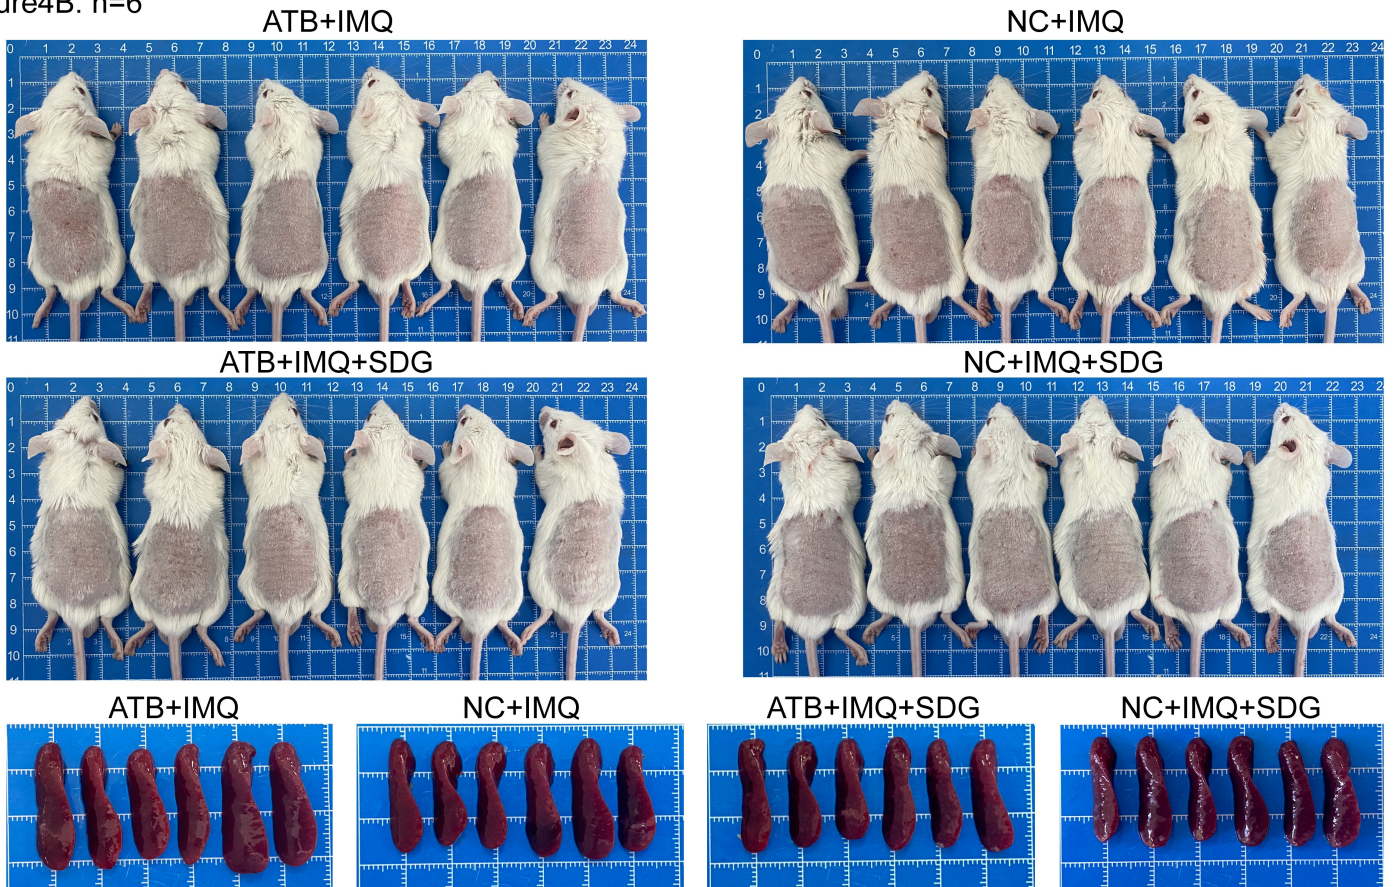

Figure4D. H&E, n=5 Ki67, n=3

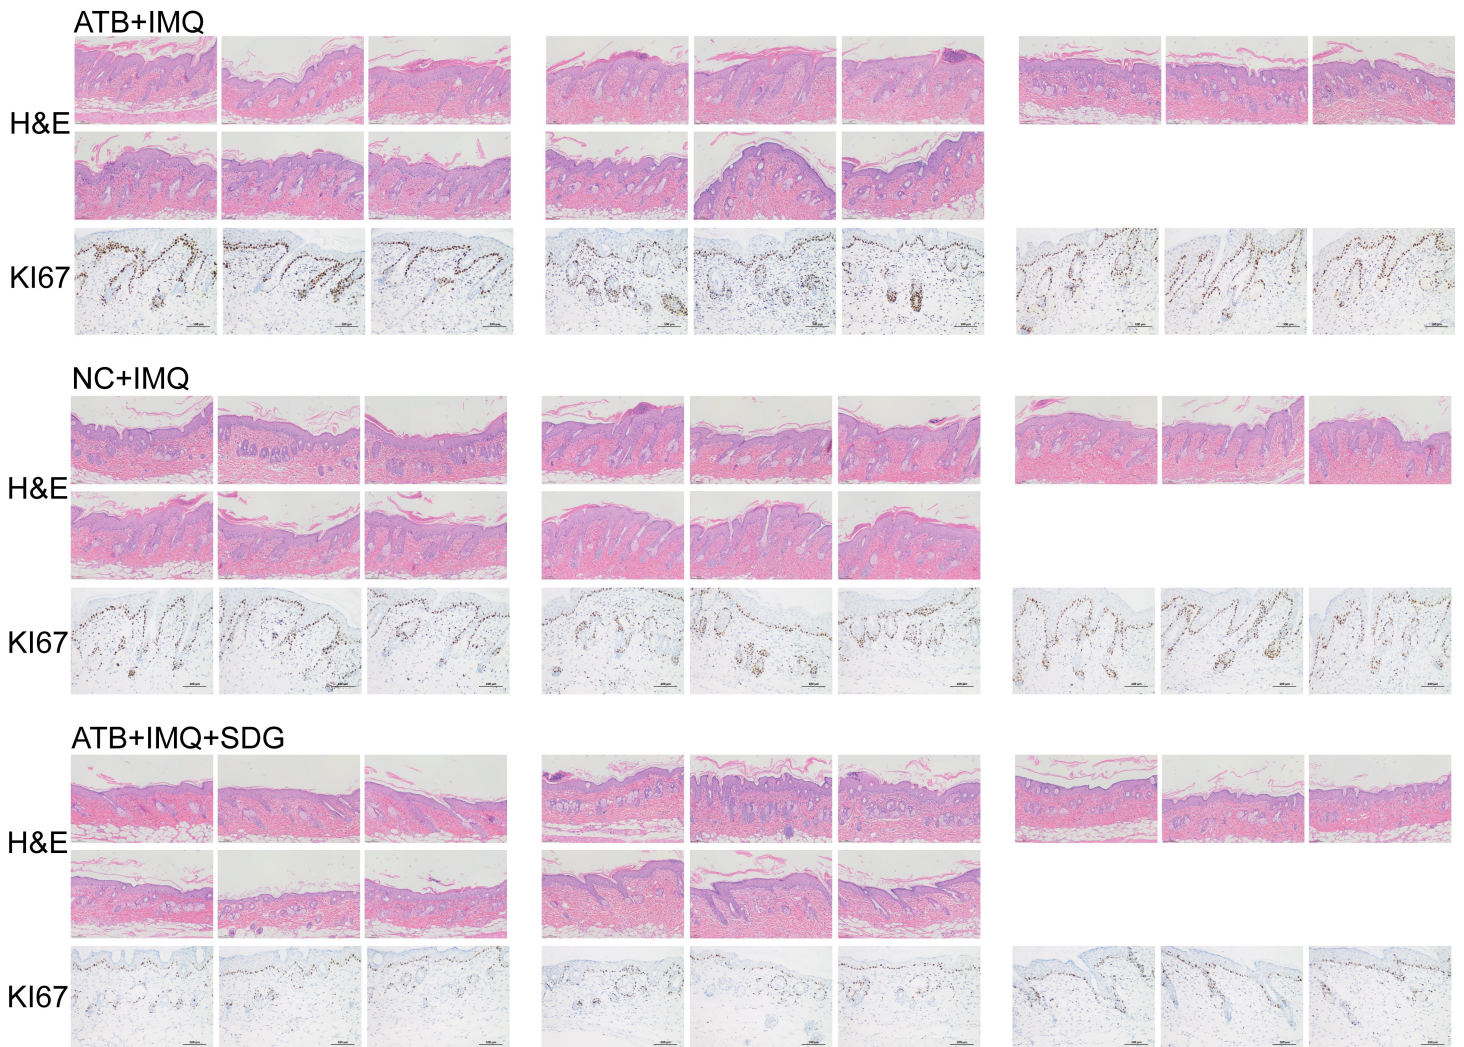

Supplement: d5fo04965b8.pdf [file d5fo04965b8.pdf]

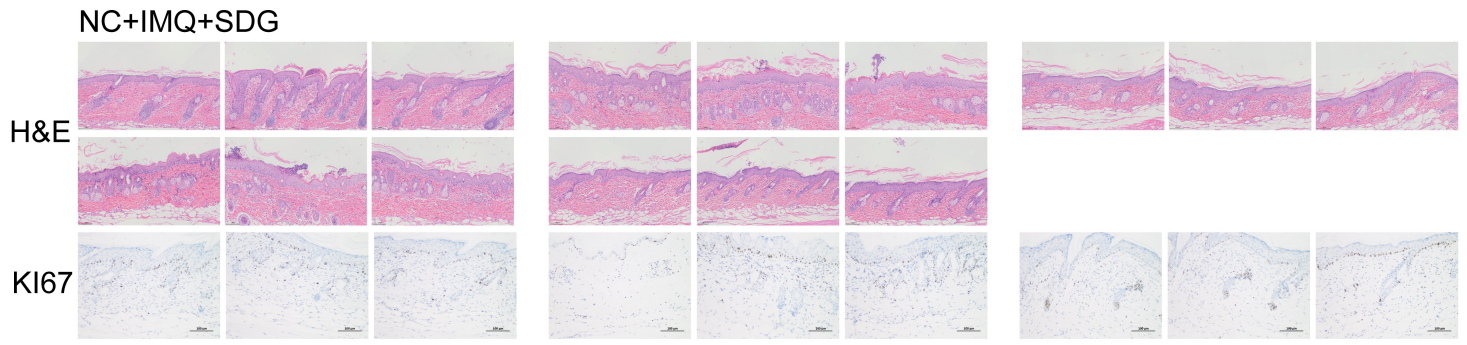

Figure4I. n=3 The arrow indicates the target protein.

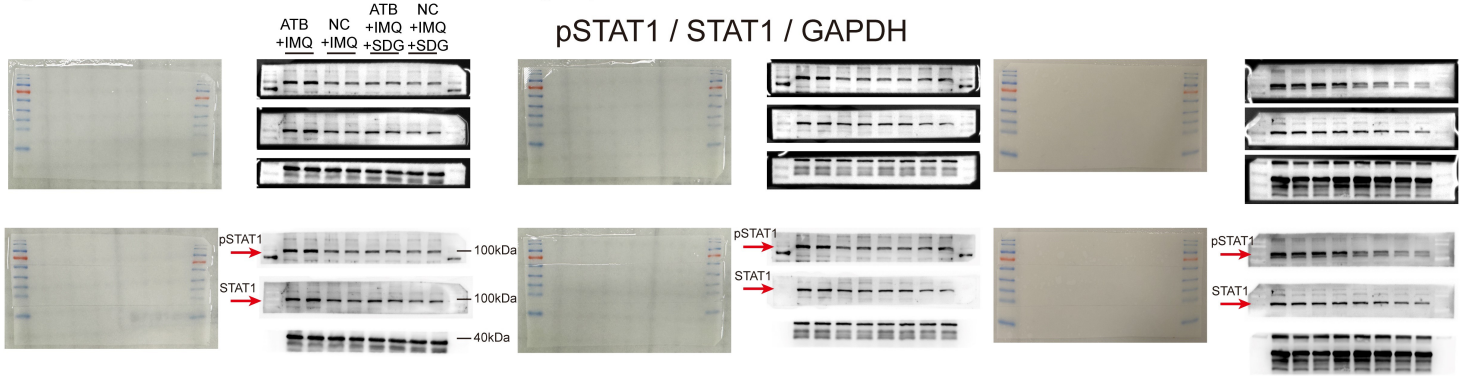

Figure4J. n=3

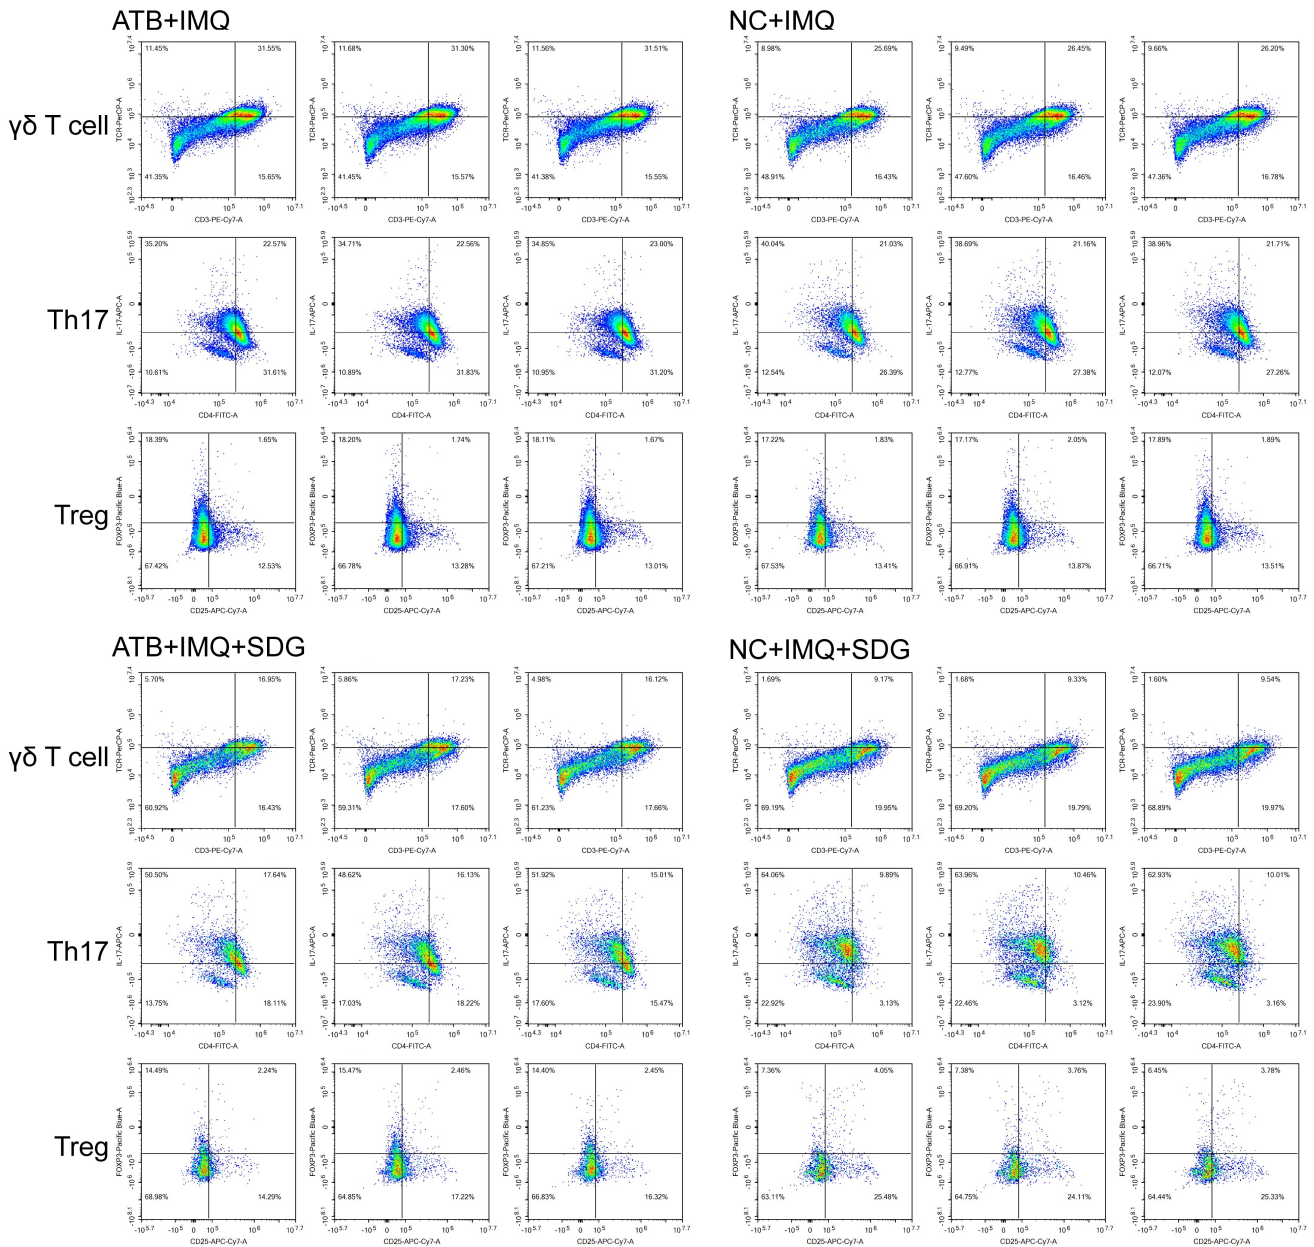

Supplement: d5fo04965b9.pdf [file d5fo04965b9.pdf]
